# Supplementary material for: Functional principal component analysis and sparse-group LASSO to identify associations between biomarker trajectories and mortality among hospitalized SARS-CoV-2 infected individuals
Source: Springer Nature journal article supplement (doi:10.1186/s12874-023-02076-3), 2023-10-28
Supplement: MOESM1 [file 26235288]

**Supplementary Figure 1.** The mean function and the first three eigenfunctions (FPCs) of the 20 biomarkers, among females and males respectively

Blood urea nitrogen, females

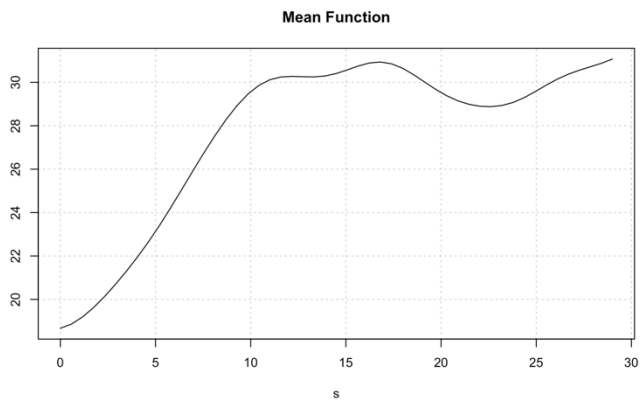

Blood urea nitrogen, males

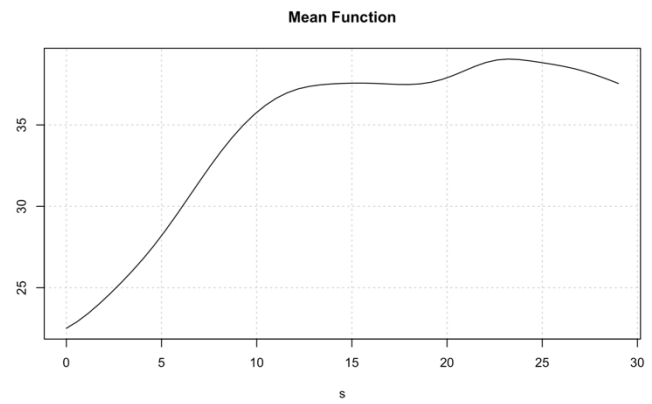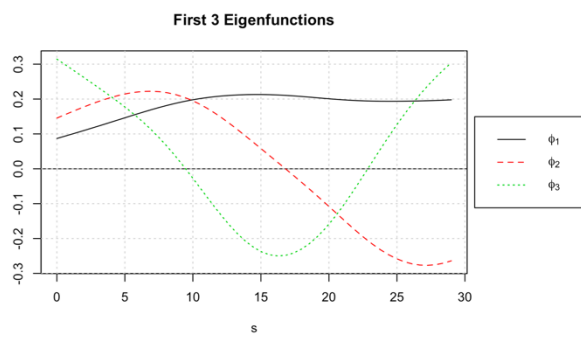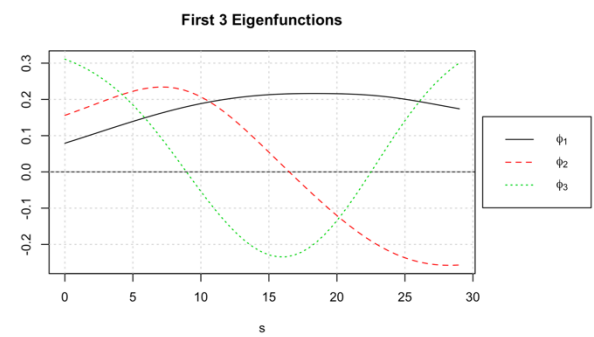

Creatinine, females

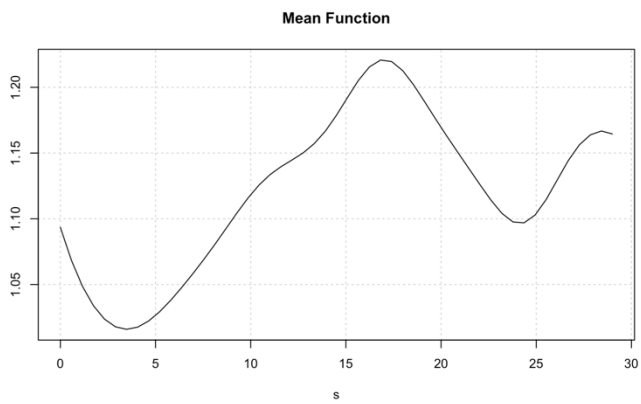

Creatinine, males

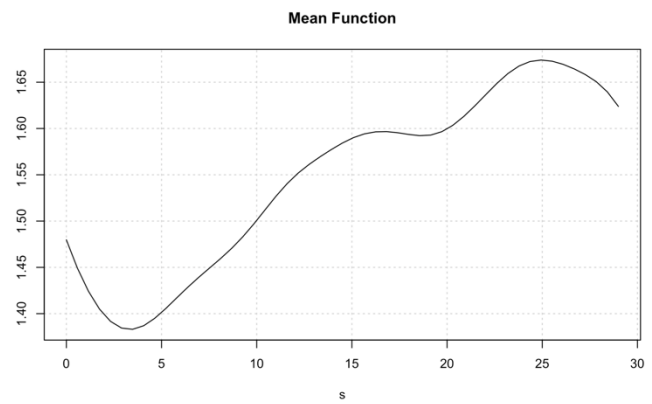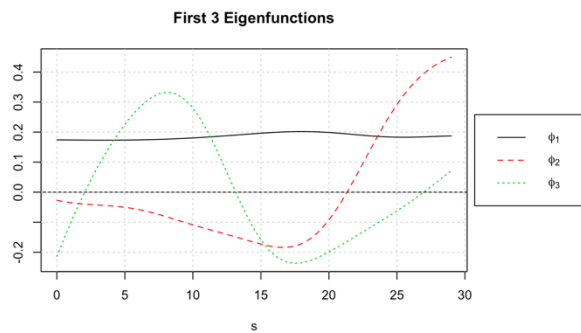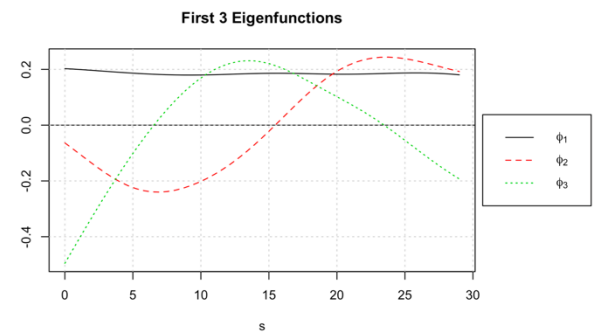

Estimated glomerular filtration rate, females

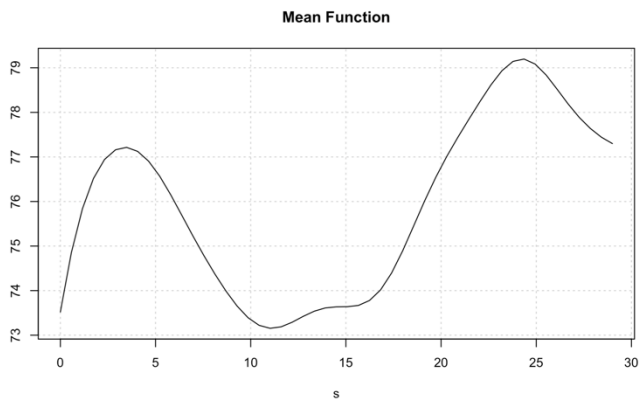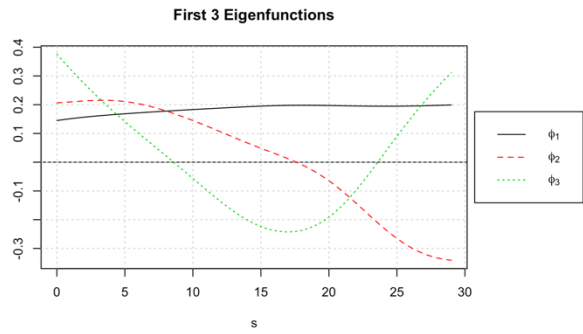

Estimated glomerular filtration rate, males

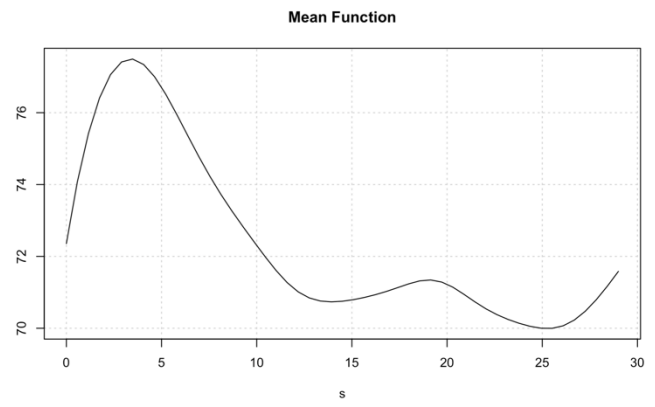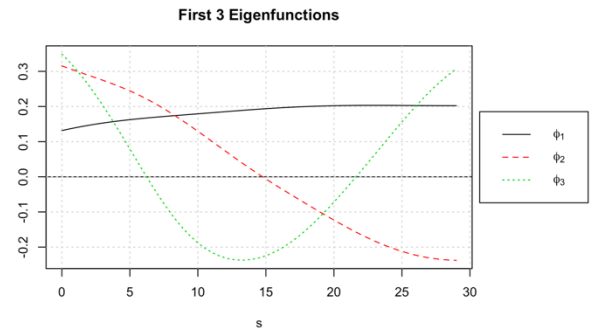

Creatine phosphokinase, females

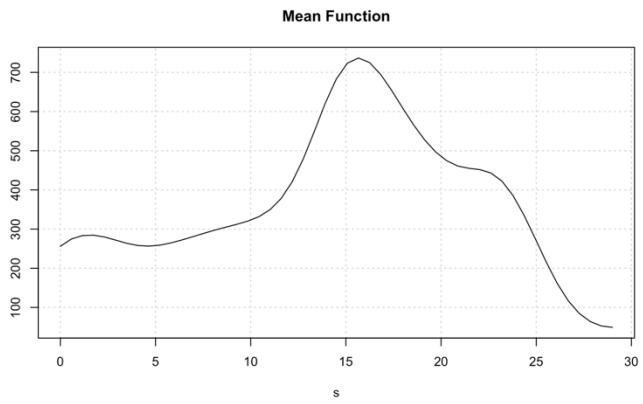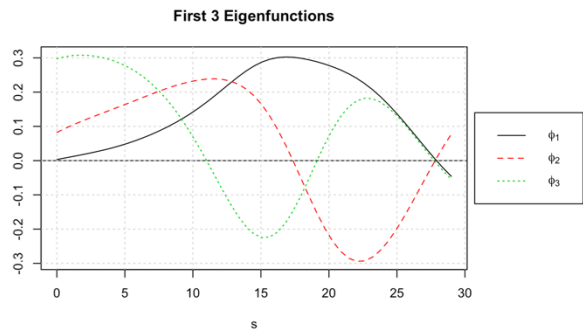

Creatine phosphokinase, males

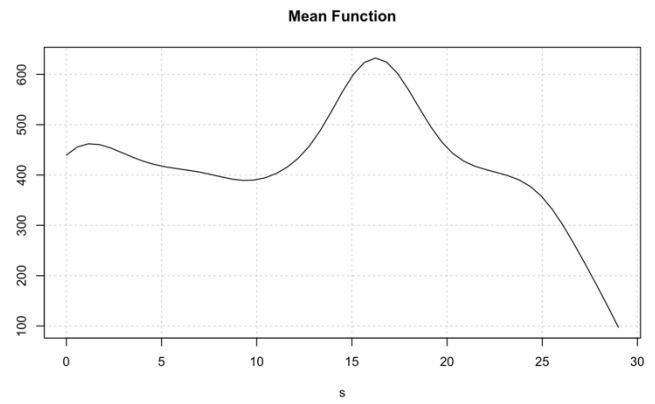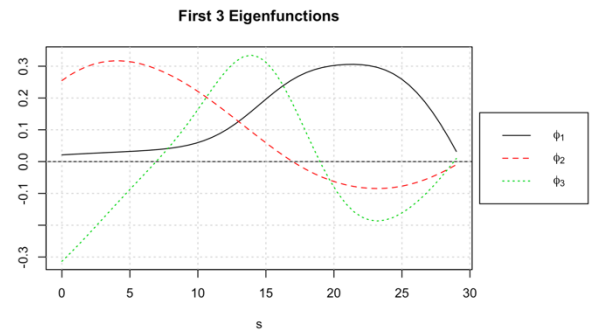

### D-dimer, females

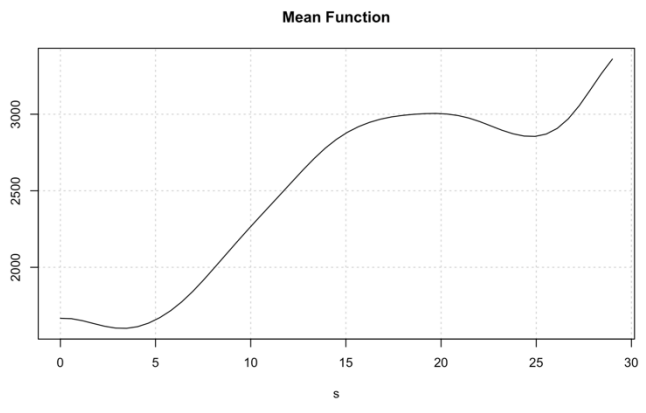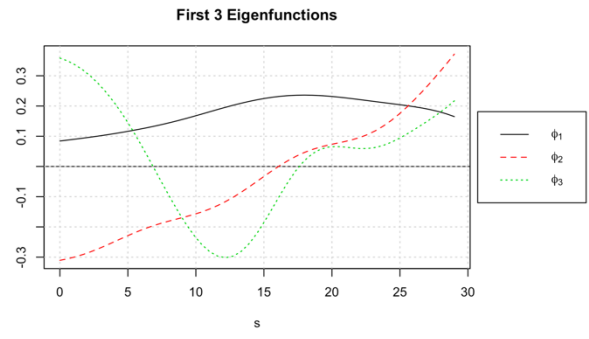

### D-dimer, males

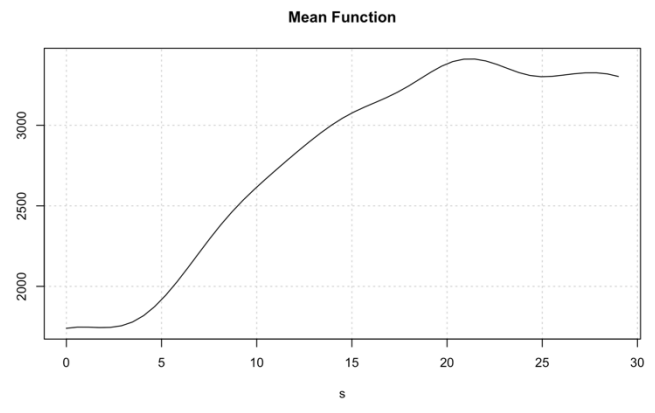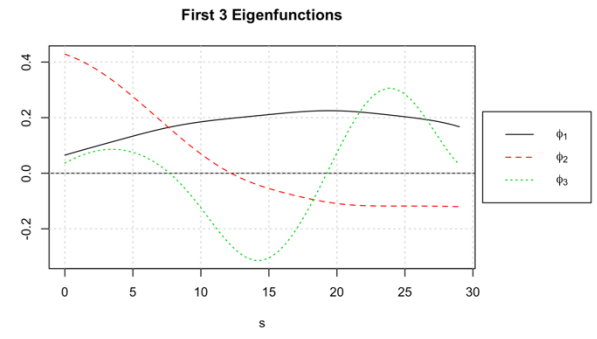

### C-reactive protein, females

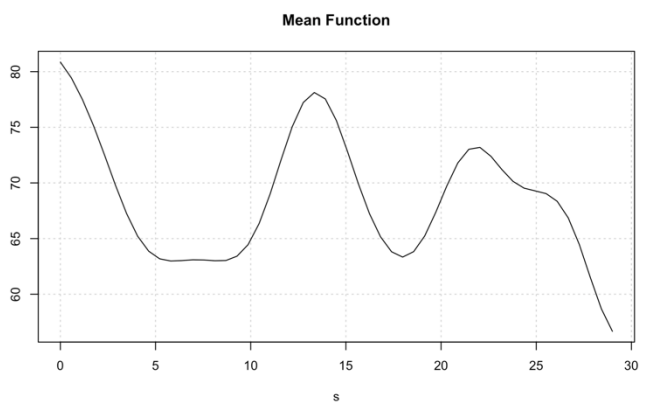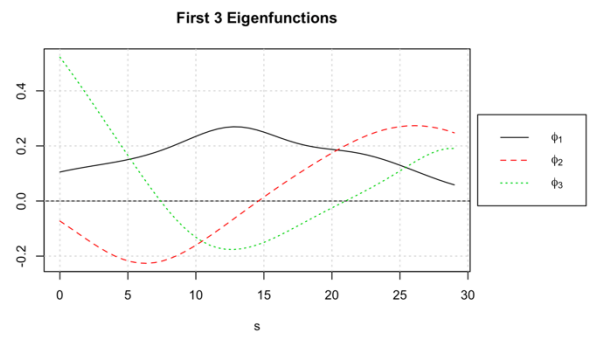

### C-reactive protein, males

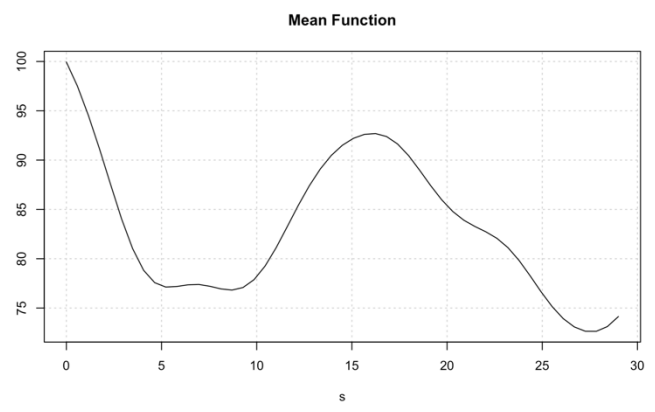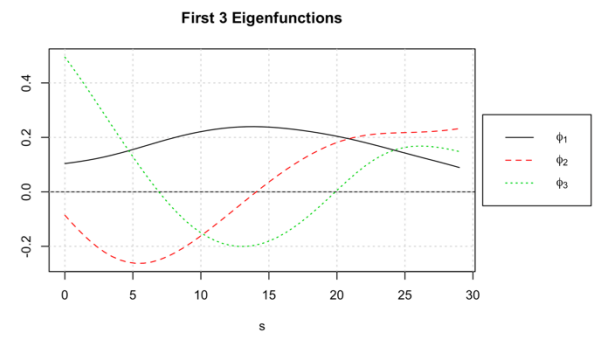

### White blood cell count, females

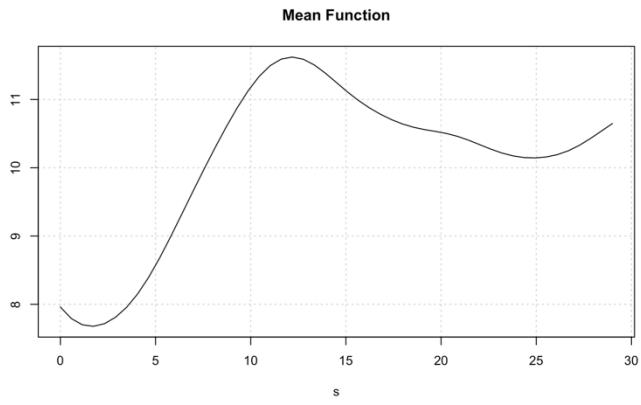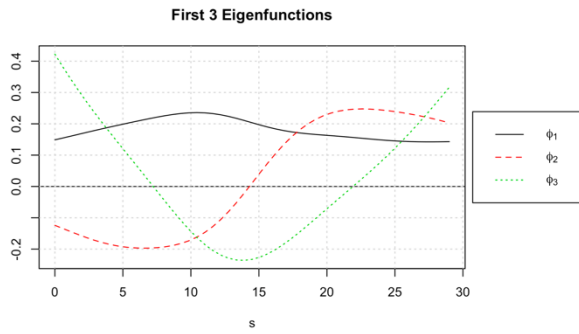

### White blood cell count, males

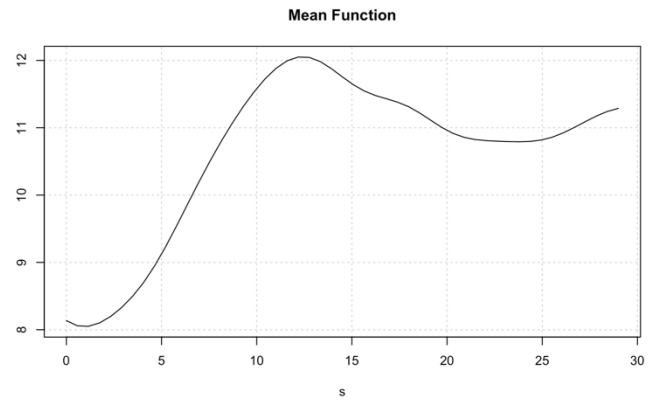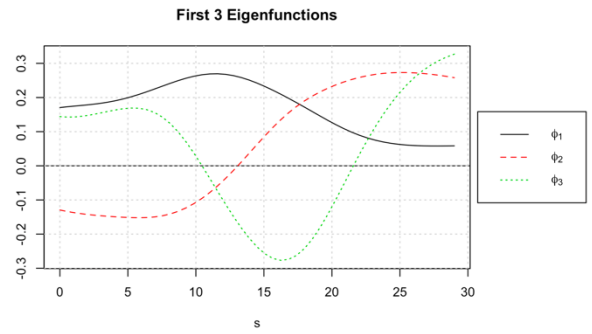

### Absolute lymphocyte count, females

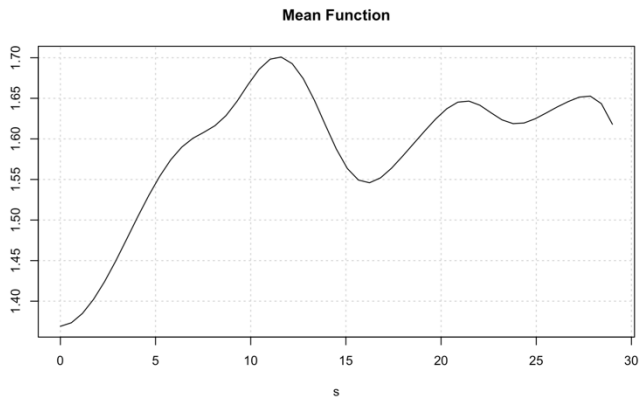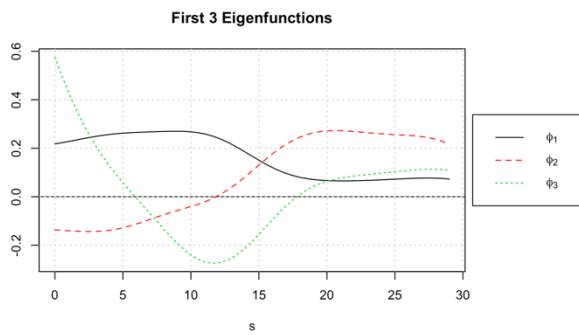

### Absolute lymphocyte count, males

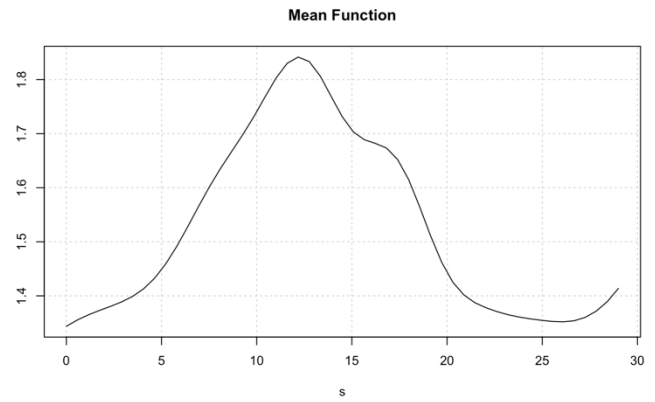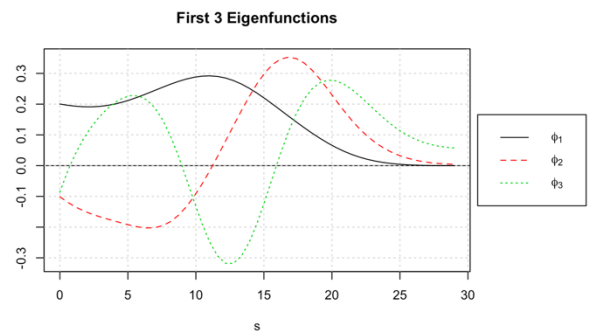

## Ferritin, females

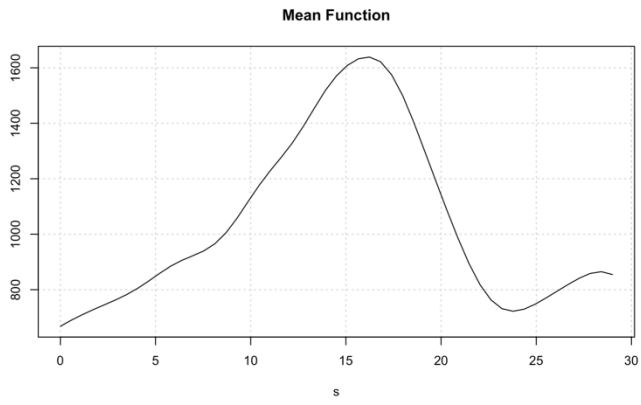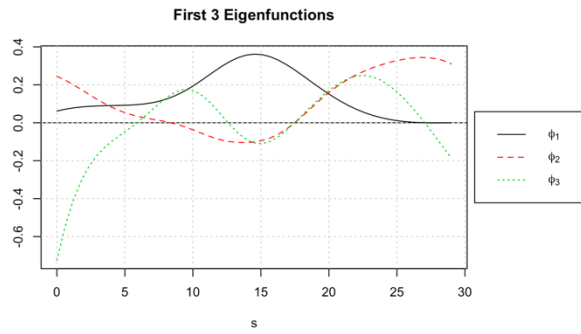

## Ferritin, males

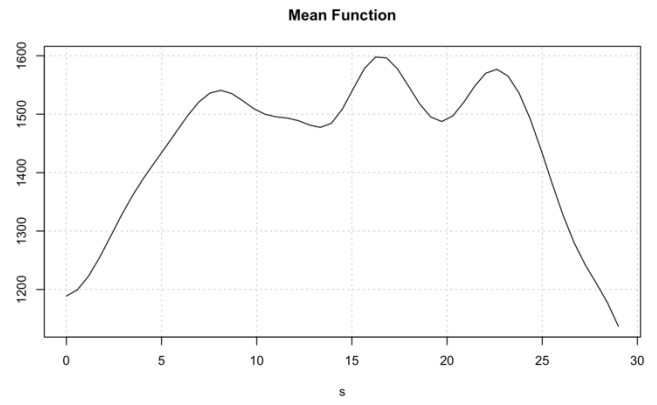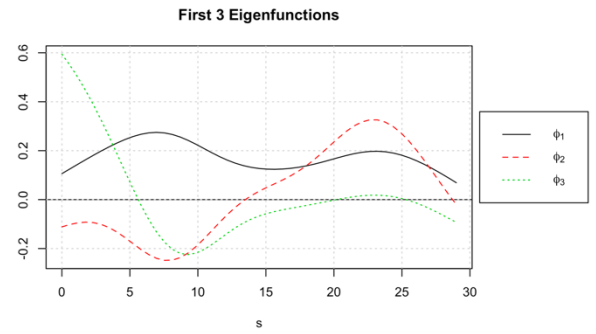

## Hemoglobin, females

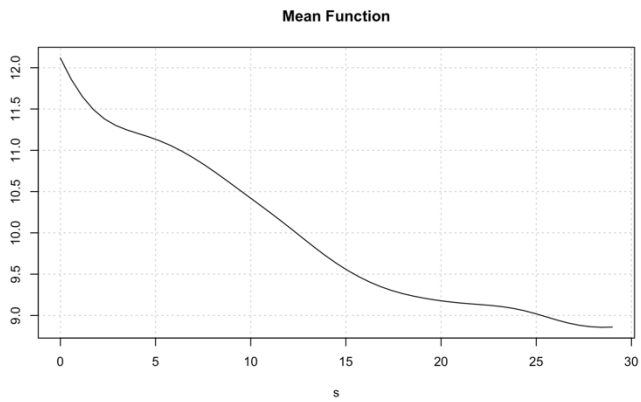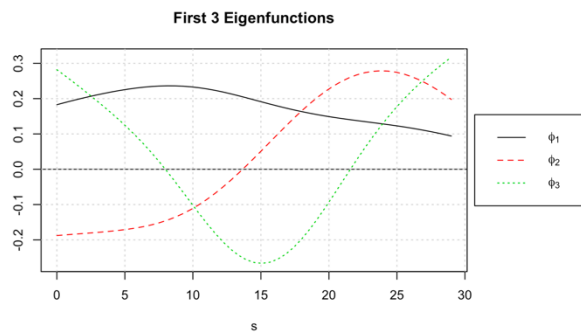

## Hemoglobin, males

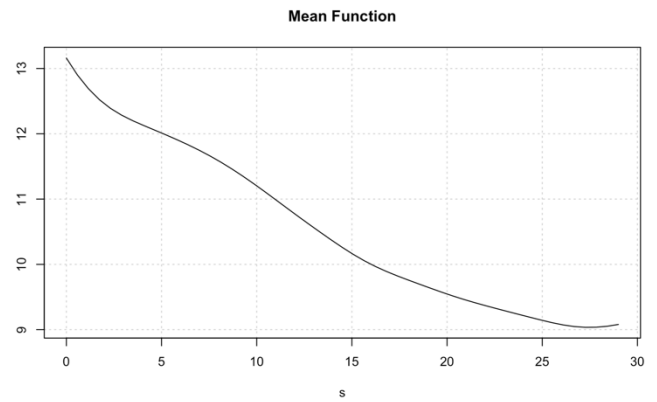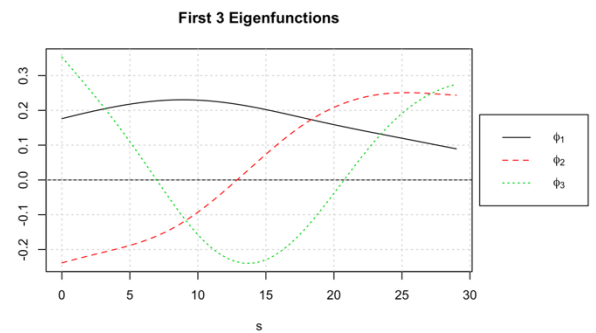

## Hematocrit, females

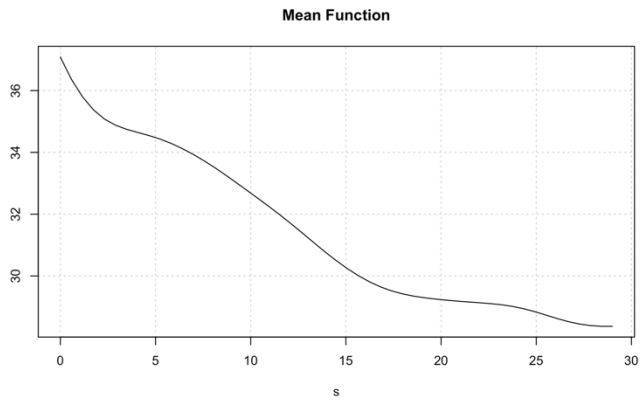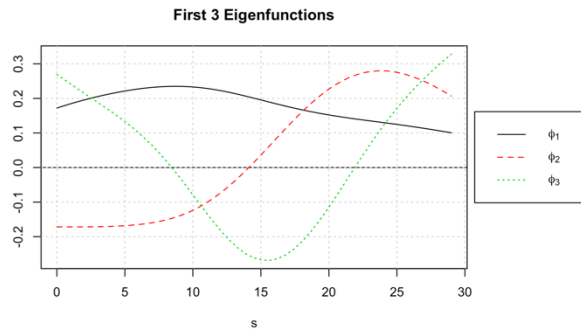

## Hematocrit, males

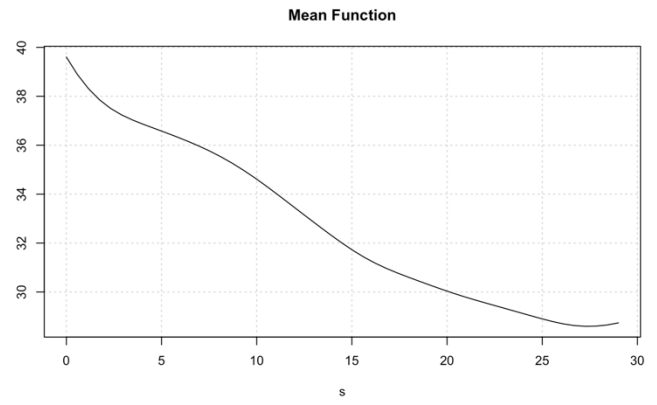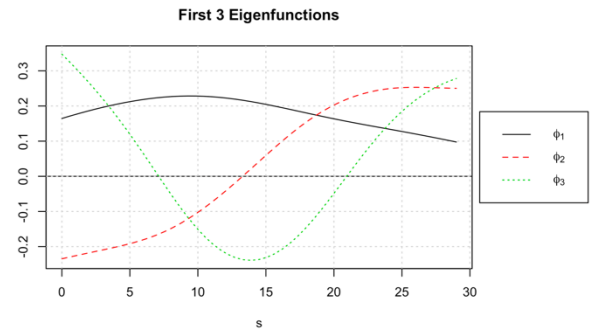

## Platelets, females

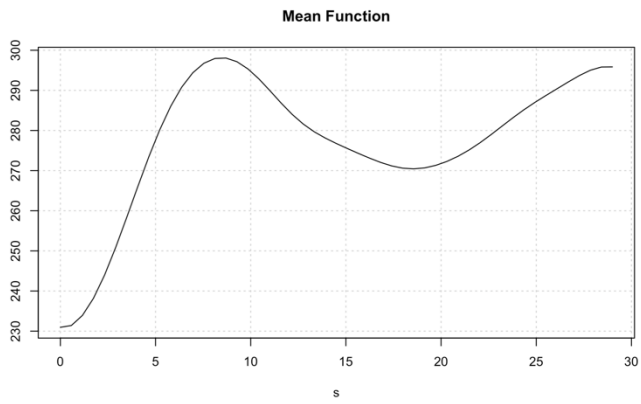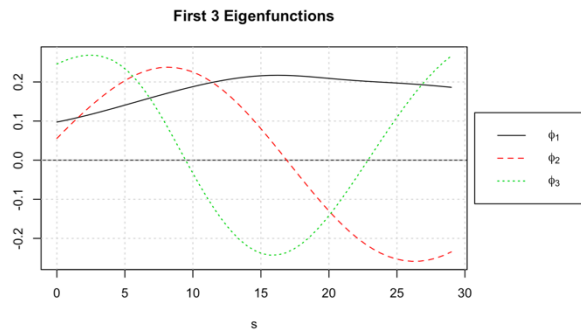

## Platelets, males

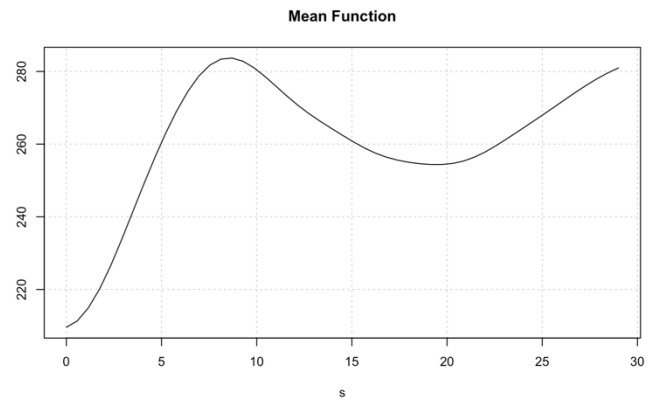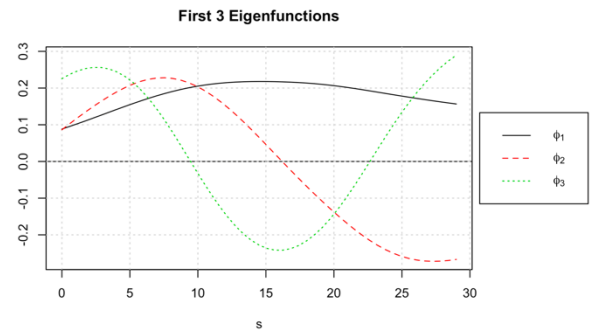

### Alanine aminotransferase, females

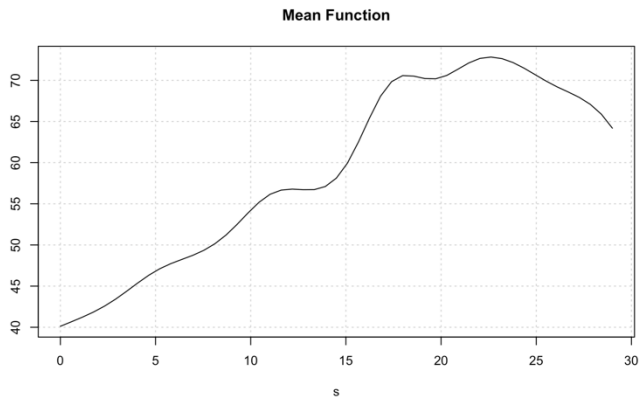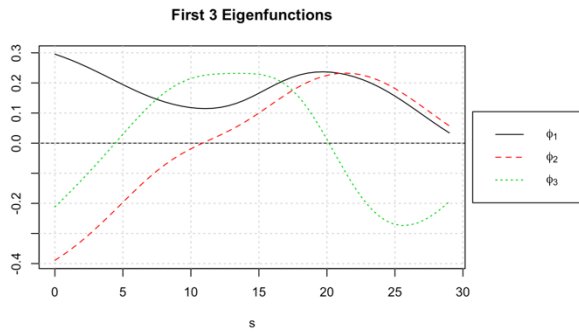

### Alanine aminotransferase, males

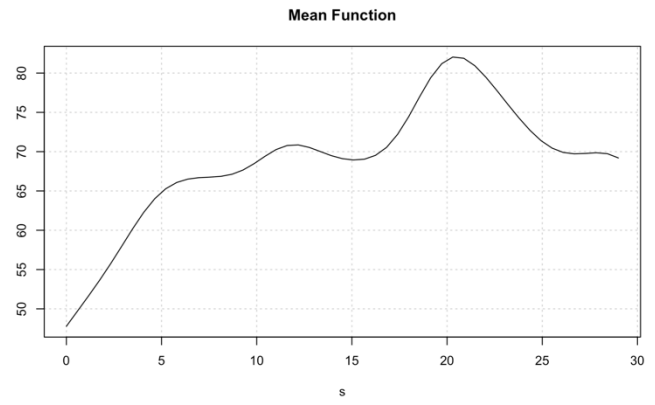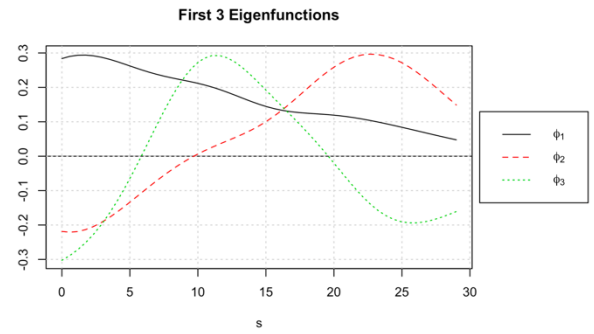

### Aspartate aminotransferase, females

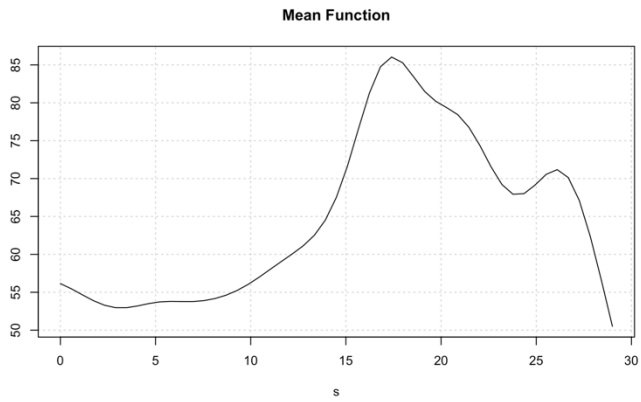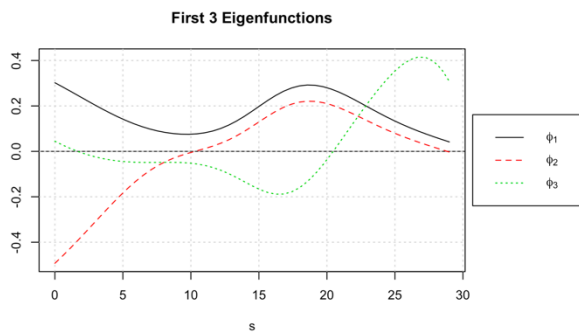

### Aspartate aminotransferase, males

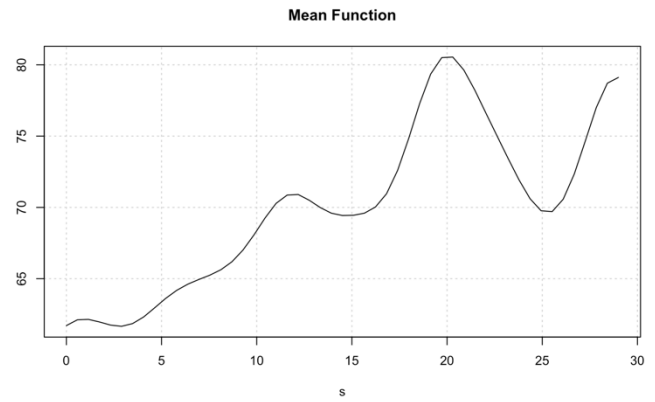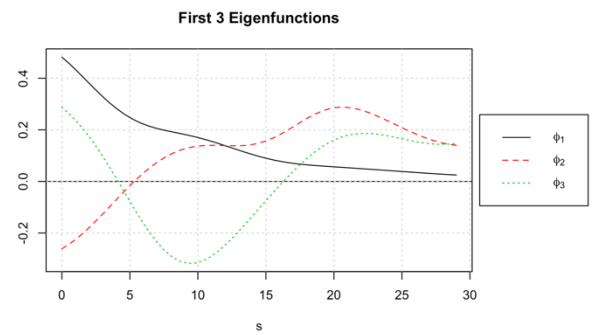

### Alkaline phosphatase, females

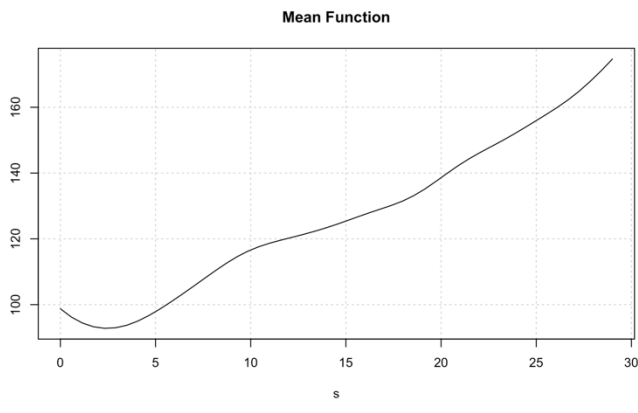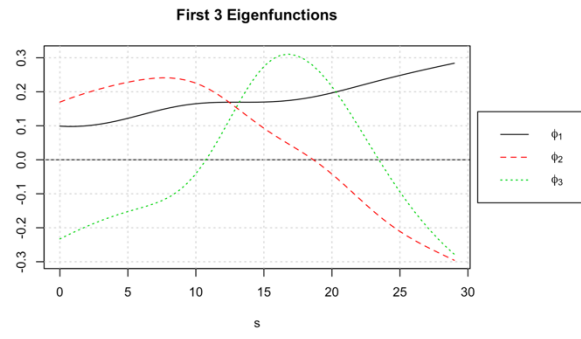

### Alkaline phosphatase, males

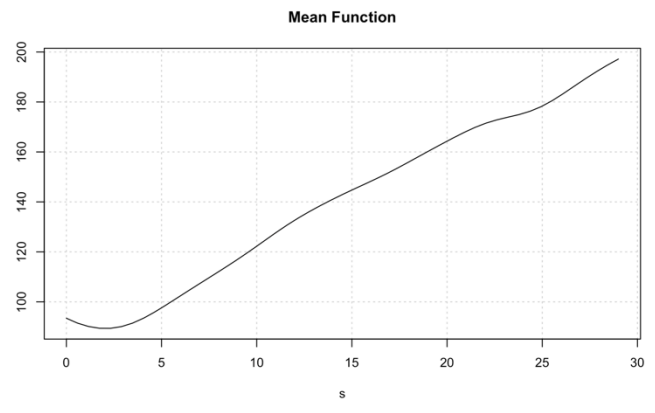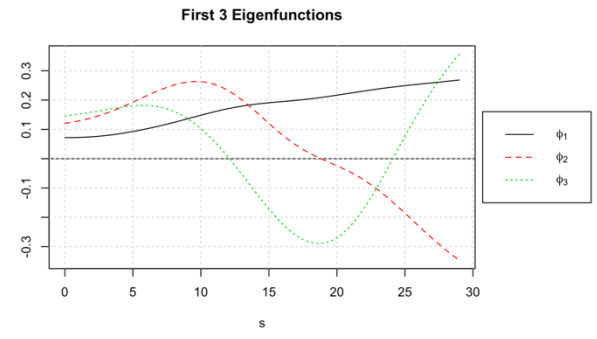

### Total bilirubin, females

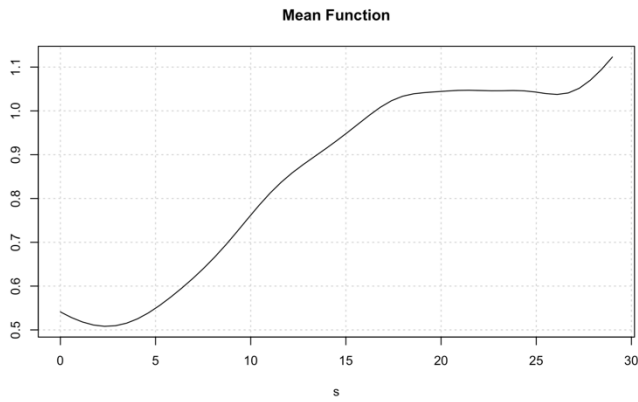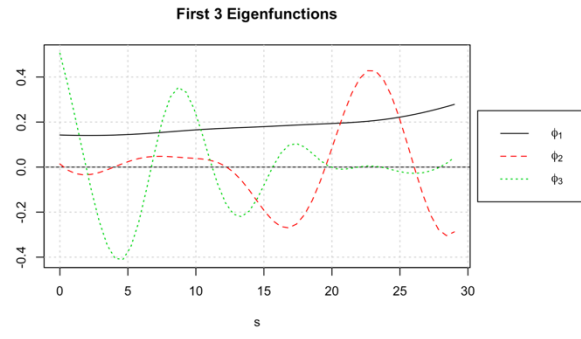

### Total bilirubin, males

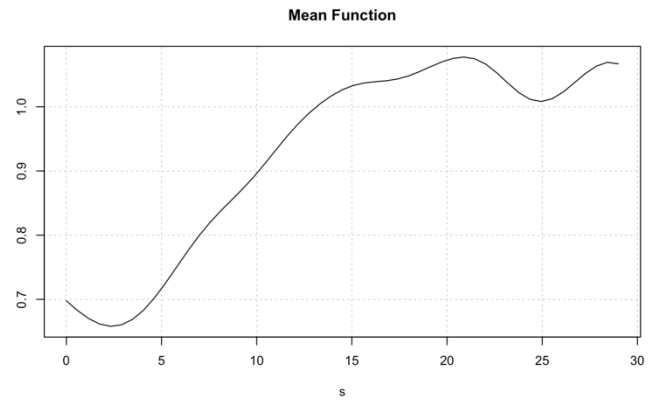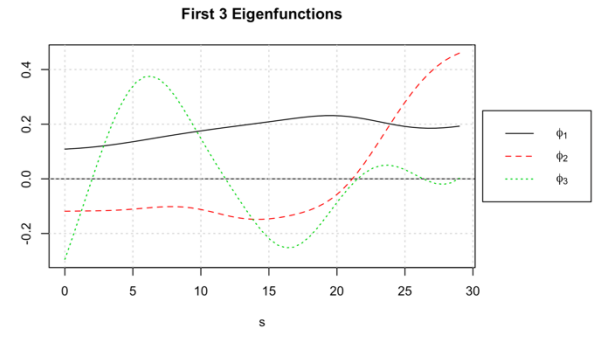



### Albumin, females

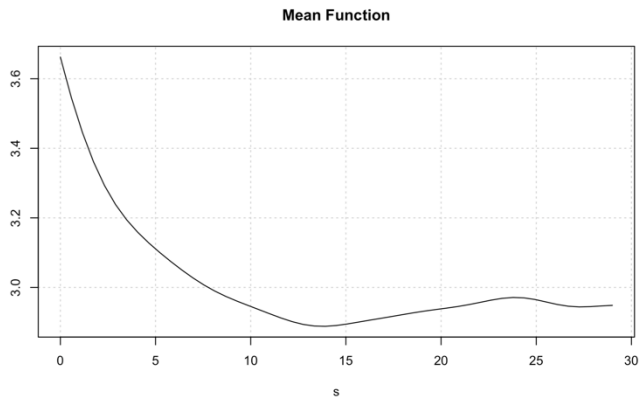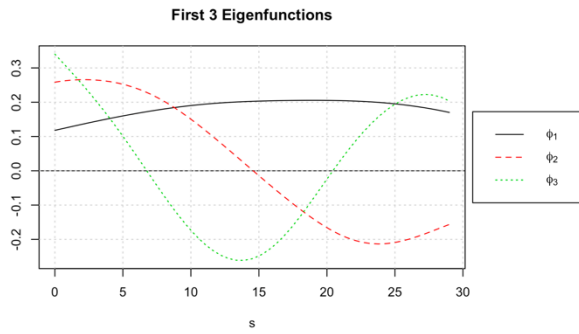

### Albumin, males

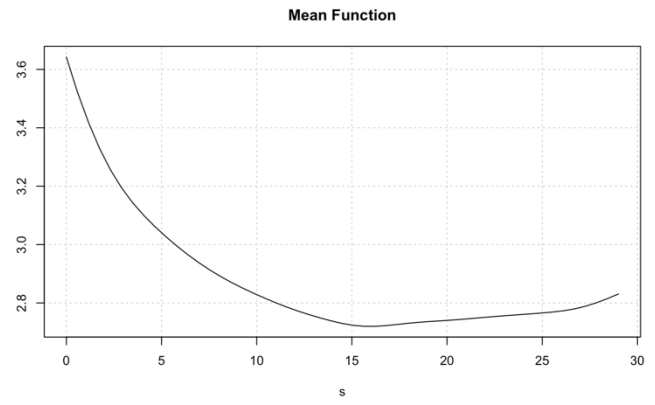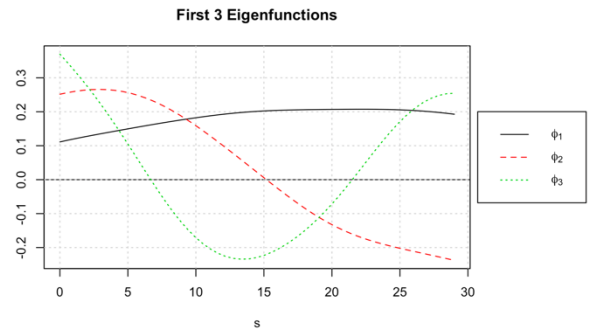

### Lactate dehydrogenase, females

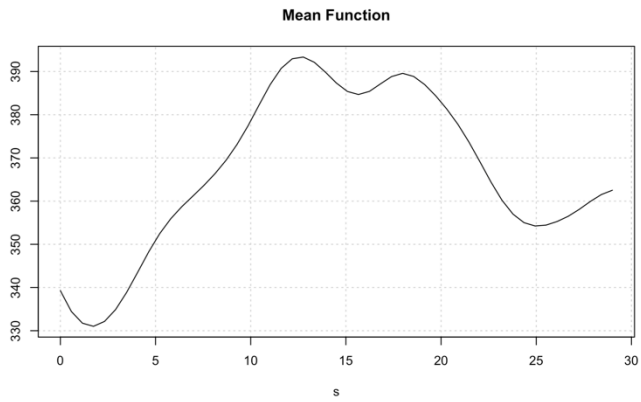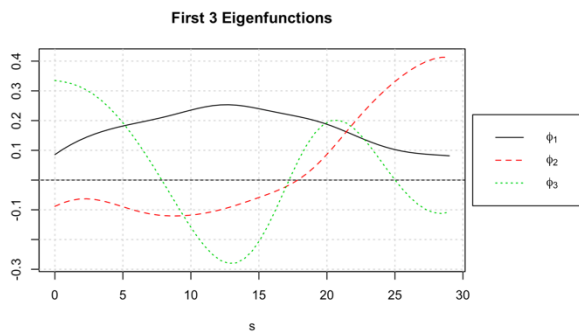

### Lactate dehydrogenase, males

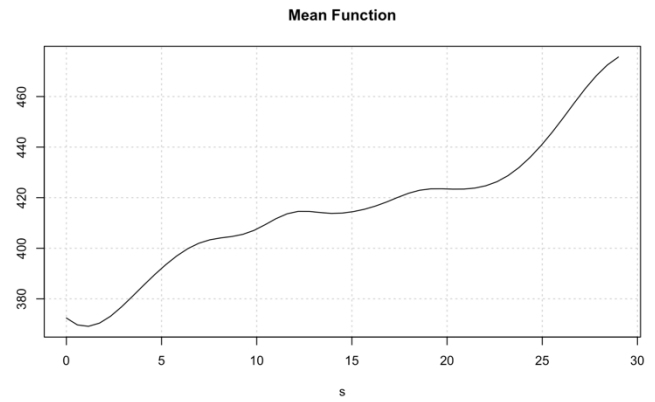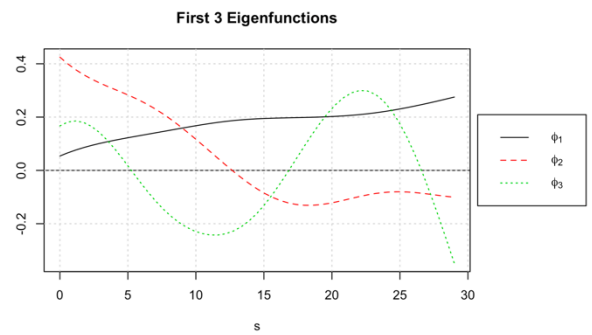

### Glucose, females

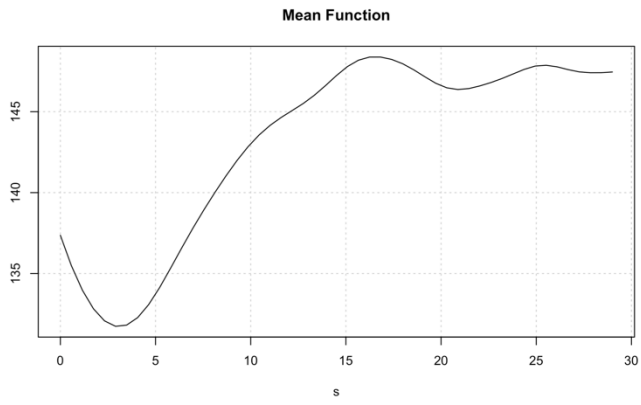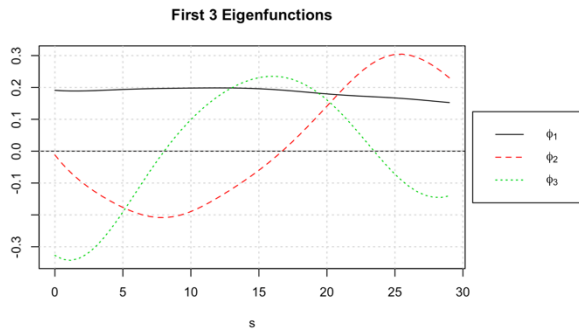

### Glucose, males

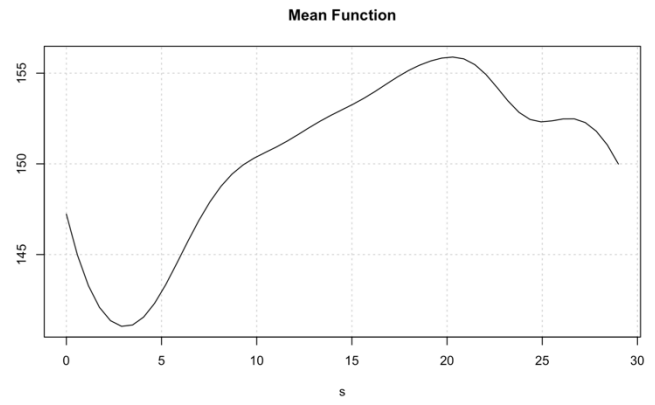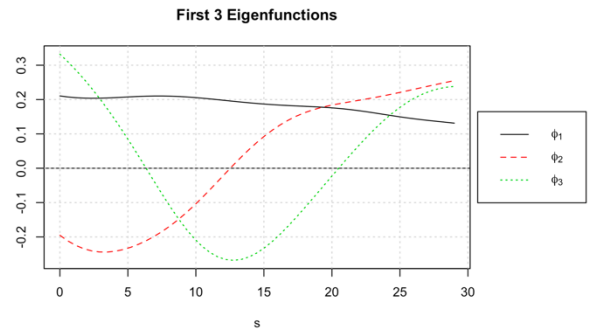

### Anion gap, females

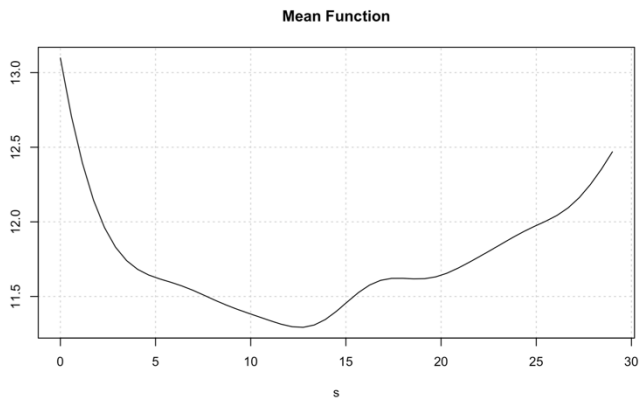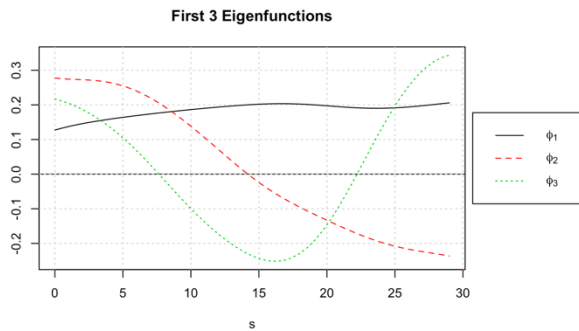

### Anion gap, males

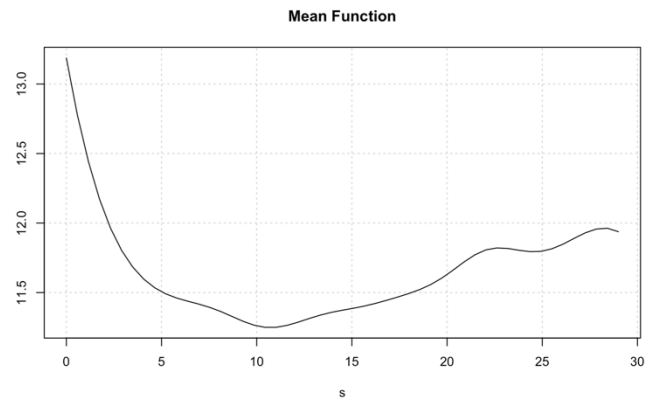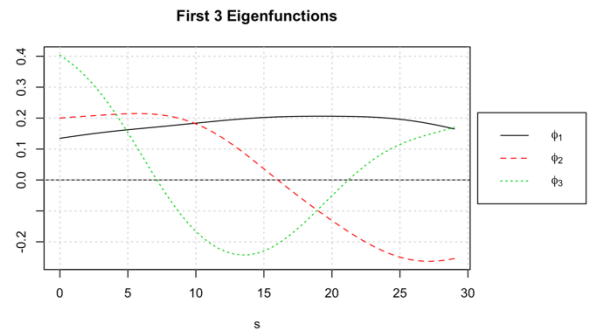

**Supplementary Figure 2.** Histogram of the first three FPC scores for the 20 biomarkers after imputation and standardization, among females (Panel A) and males (Panel B) respectively

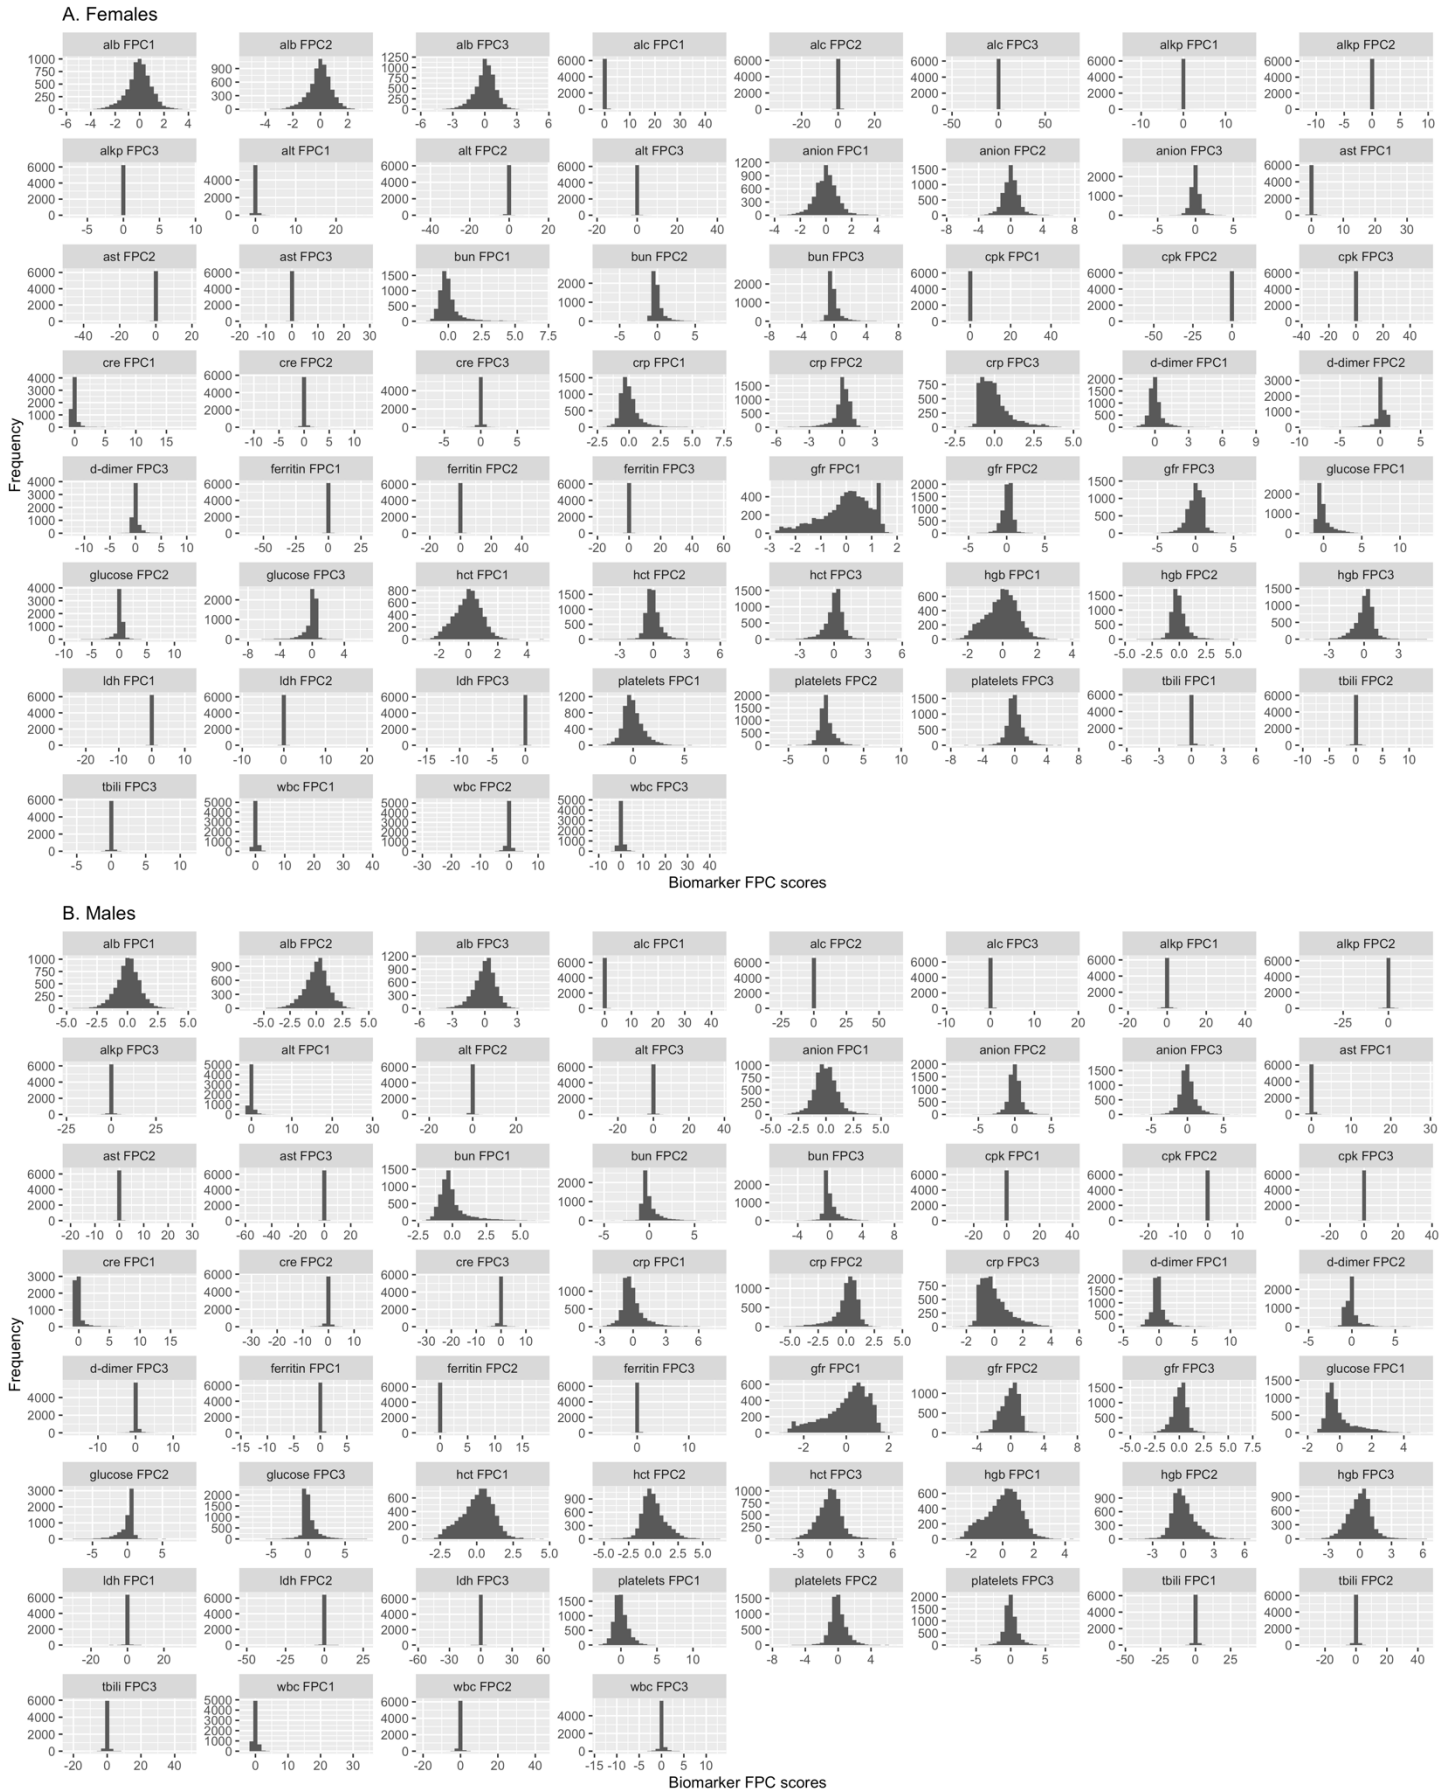

**Supplementary Figure 3.** Visualization example of how each patient's FPC scores could represent the variation of their individual biomarker trajectories from the mean function. The mean function (Panel a) and the first three eigenfunctions (Panel B) estimated from FPCA for blood urea nitrogen (bun) among males are the same as shown in Supplementary Figure 1. Panel C illustrates individual trajectories of bun of three male patients with different FPC scores (Panel D).

A.

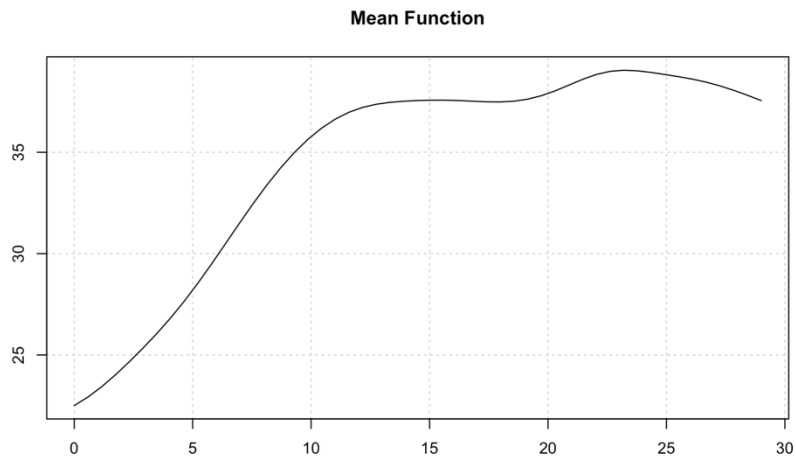

C.

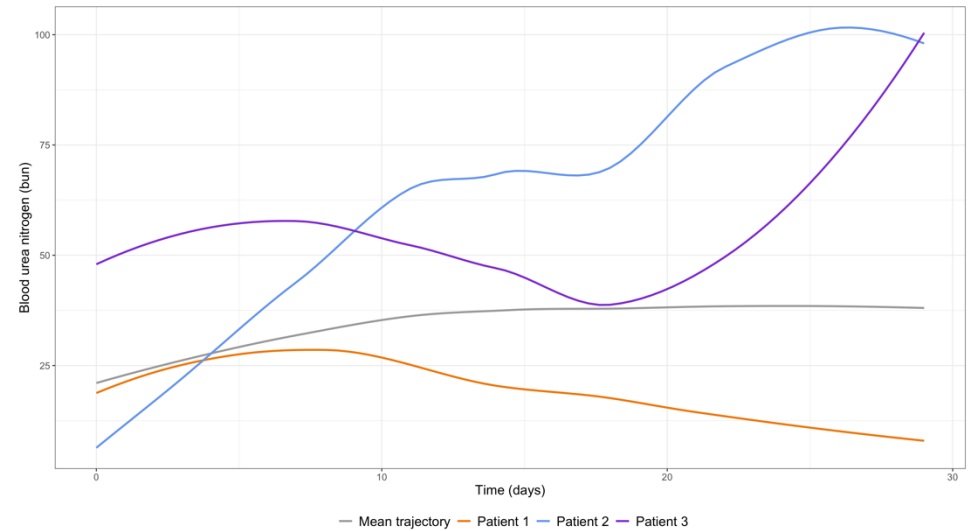

B.

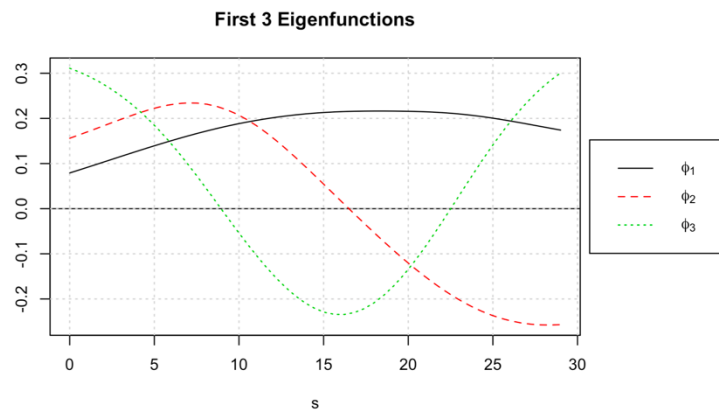

D.

|           | Scores for FPC1 ( $A_{1i1}$ ) | Scores for FPC2 ( $A_{1i2}$ ) | Scores for FPC3 ( $A_{1i3}$ ) |
|-----------|-------------------------------|-------------------------------|-------------------------------|
| Patient 1 | -88                           | 44                            | -1                            |
| Patient 2 | 185                           | -103                          | 2                             |
| Patient 3 | 102                           | 2                             | 81                            |

**Supplementary Figure 4.** Histogram of the baseline (Panel A and B) and peak (Panel C and D) measurements for the 20 biomarkers after log transformation, imputation and standardization, among females (Panel A and C) and males (Panel B and D) respectively

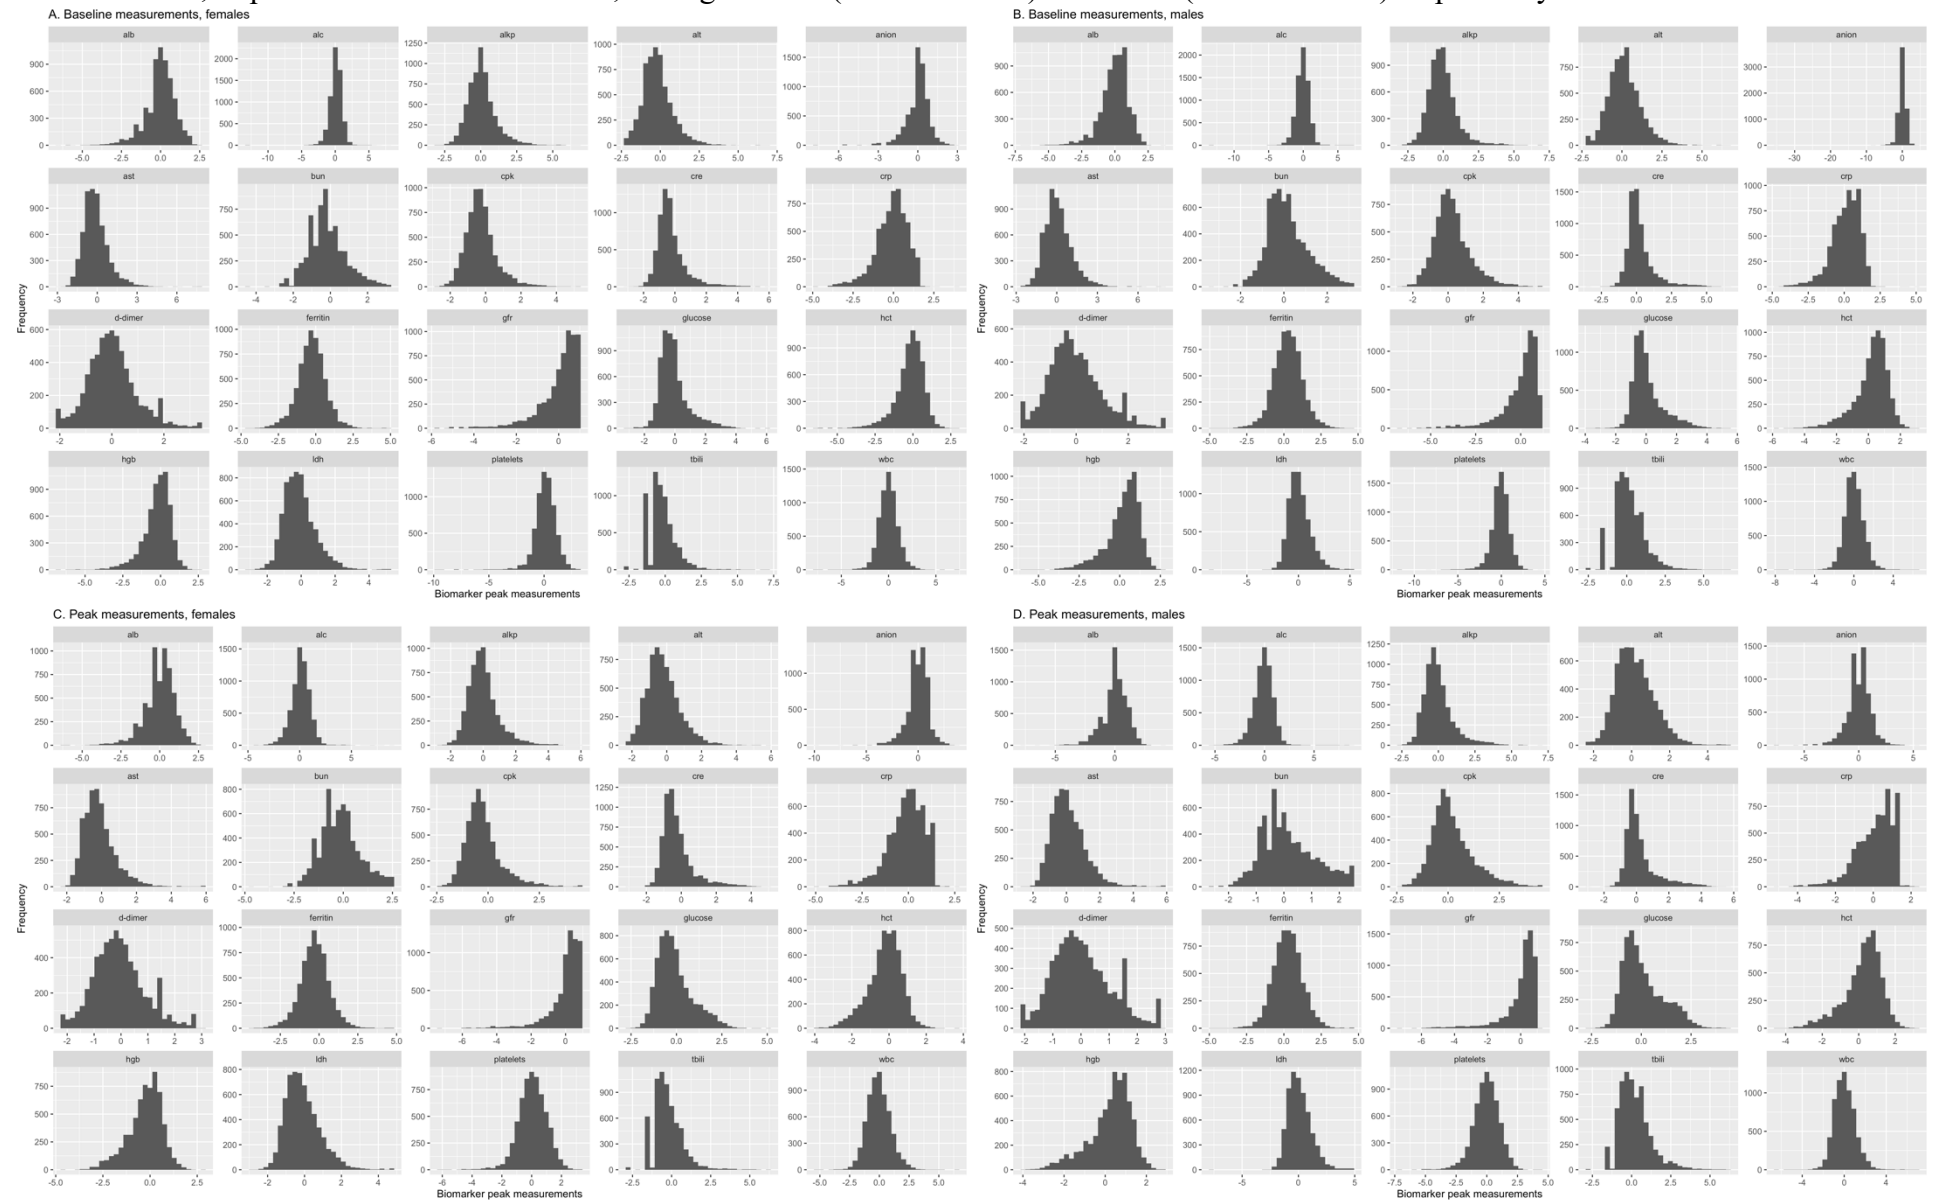

**Supplementary Figure 5.** Sensitivity analysis: Estimated regression coefficients  $\hat{\beta}$  from SGL models fitted with the scores of the first 3 FPCs of each biomarker as exposure variables, and with different weight (larger  $\eta$  implies more LASSO than group LASSO structure), tiles with no border or annotated numbers indicate  $\hat{\beta}$  being regularized to zero (The full names of the abbreviated biomarkers are listed at the end of the manuscript.)

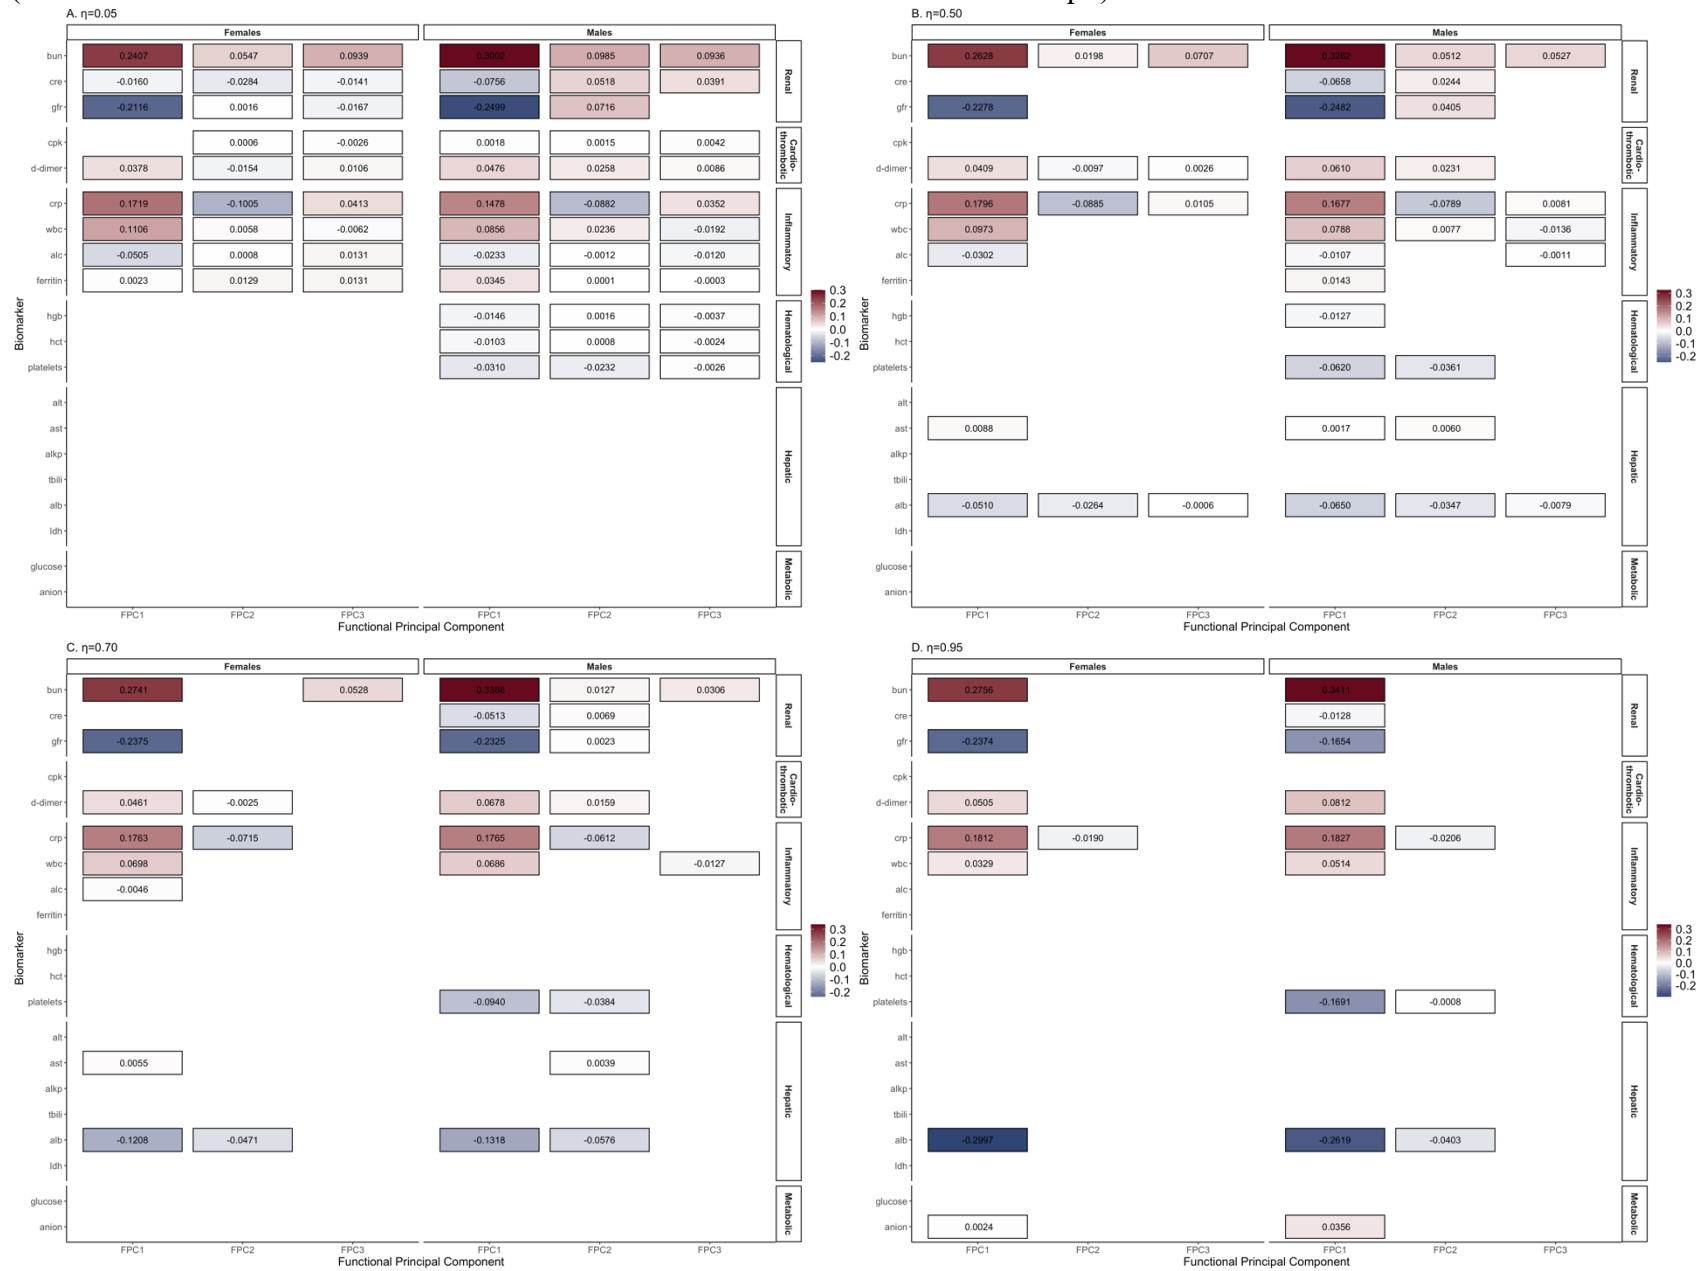

**Supplementary Table 1.** Summary statistics for the 20 biomarkers categorized into 6 groups based on their pathophysiological classifications

| Biomarker groups  | Biomarkers                                 | Summary measures                             | Total                | Female             | Male                    |
|-------------------|--------------------------------------------|----------------------------------------------|----------------------|--------------------|-------------------------|
| Renal             | Blood urea nitrogen (bun)                  | Baseline                                     | 15 (11, 23.5)        | 14 (9, 21)         | 17 (12, 25.5)           |
|                   |                                            | Peak                                         | 21 (14, 34)          | 19 (13, 30)        | 23 (16, 39)             |
|                   |                                            | Number of subjects with $\geq 1$ measurement | 12589 (97.3%)        | 5960 (94.6%)       | 6629 (99.8%)            |
|                   |                                            | Number of measurements                       | 5 (3, 9)             | 5 (3, 8)           | 6 (3, 10)               |
|                   | Creatinine (cre)                           | Baseline                                     | 0.95 (0.76, 1.25)    | 0.82 (0.68, 1.07)  | 1.05 (0.88, 1.375)      |
|                   |                                            | Peak                                         | 1 (0.81, 1.38)       | 0.87 (0.71, 1.16)  | 1.11 (0.93, 1.55)       |
|                   |                                            | Number of subjects with $\geq 1$ measurement | 12609 (97.4%)        | 5980 (94.9%)       | 6629 (99.8%)            |
|                   |                                            | Number of measurements                       | 5 (3, 9)             | 5 (3, 8)           | 6 (3, 10)               |
|                   | Estimated glomerular filtration rate (gfr) | Baseline                                     | 77 (52, 97)          | 77 (52, 97)        | 77 (52, 96)             |
|                   |                                            | Peak                                         | 93 (72, 108)         | 92 (72, 108)       | 94 (72, 108)            |
|                   |                                            | Number of subjects with $\geq 1$ measurement | 12600 (97.4%)        | 5975 (94.8%)       | 6625 (99.8%)            |
|                   |                                            | Number of measurements                       | 5 (3, 9)             | 5 (3, 8)           | 6 (3, 10)               |
| Cardio-thrombotic | Creatine phosphokinase (cpk)               | Baseline                                     | 107 (59, 231)        | 82 (49, 161)       | 139 (73, 311.75)        |
|                   |                                            | Peak                                         | 128 (67, 320)        | 94 (55, 205)       | 174 (86, 430)           |
|                   |                                            | Number of subjects with $\geq 1$ measurement | 9183 (71.0%)         | 4237 (67.3%)       | 4946 (74.5%)            |
|                   |                                            | Number of measurements                       | 1 (0, 4)             | 1 (0, 3)           | 2 (0, 4)                |
|                   | D-dimer                                    | Baseline                                     | 1071 (631, 2035)     | 1080 (638, 1951)   | 1056 (623.875, 2104.75) |
|                   |                                            | Peak                                         | 1351 (729.5, 3095.5) | 1279 (714, 2794)   | 1418.5 (738, 3462.25)   |
|                   |                                            | Number of subjects with $\geq 1$ measurement | 6139 (47.4%)         | 2825 (44.8%)       | 3314 (49.9%)            |
|                   |                                            | Number of measurements                       | 0 (0, 3)             | 0 (0, 2)           | 0 (0, 3)                |
| Inflammatory      | C-reactive protein (crp)                   | Baseline                                     | 63.55 (22.3, 127)    | 53.7 (17.1, 108.8) | 72.7 (29.15, 137.75)    |
|                   |                                            | Peak                                         | 83.25 (33.9, 154.3)  | 69.9 (26.9, 141.5) | 99.5 (42.3, 168.85)     |
|                   |                                            | Number of subjects with $\geq 1$ measurement | 9404 (72.7%)         | 4357 (69.2%)       | 5047 (76.0%)            |
|                   |                                            | Number of measurements                       | 2 (0, 4)             | 2 (0, 4)           | 2 (1, 5)                |
|                   | White blood cell count (wbc)               | Baseline                                     | 7.03 (5.17, 9.59)    | 7.03 (5.08, 9.54)  | 7.03 (5.21, 9.63)       |
|                   |                                            | Peak                                         | 9.15 (6.6, 13.13)    | 8.95 (6.47, 12.67) | 9.38 (6.71, 13.525)     |
|                   |                                            | Number of subjects with $\geq 1$ measurement | 12893 (99.6%)        | 6279 (99.7%)       | 6614 (99.6%)            |
|                   |                                            | Number of measurements                       | 5 (3, 9)             | 5 (2.75, 8)        | 5 (3, 10)               |
|                   | Absolute lymphocyte count (alc)            | Baseline                                     | 1.03 (0.69, 1.535)   | 1.12 (0.74, 1.63)  | 0.96 (0.65, 1.44)       |
|                   |                                            | Peak                                         | 1.57 (1.09, 2.18)    | 1.66 (1.17, 2.28)  | 1.49 (1.03, 2.08)       |
|                   |                                            | Number of subjects with $\geq 1$ measurement | 12384 (95.7%)        | 5822 (92.4%)       | 6562 (98.8%)            |
|                   |                                            | Number of measurements                       | 4 (2, 8)             | 4 (2, 7)           | 5 (2, 8)                |
|                   | Ferritin                                   | Baseline                                     | 488 (223, 978)       | 342.3 (160, 675)   | 656 (321.25, 1260)      |
|                   |                                            | Peak                                         | 605.5 (278.5, 1244)  | 415 (194, 839)     | 837 (397, 1601.5)       |
|                   |                                            | Number of subjects with $\geq 1$ measurement | 9319 (72.0%)         | 4340 (68.9%)       | 4979 (75.0%)            |
|                   |                                            | Number of measurements                       | 1 (0, 3)             | 1 (0, 3)           | 2 (0, 4)                |
| Hematological     | Hemoglobin (hgb)                           | Baseline                                     | 12.9 (11.5, 14.2)    | 12.4 (11.2, 13.5)  | 13.6 (12, 14.8)         |
|                   |                                            | Peak                                         | 13.2 (11.8, 14.5)    | 12.6 (11.4, 13.7)  | 13.9 (12.35, 15.1)      |
|                   |                                            | Number of subjects with $\geq 1$ measurement | 12893 (99.6%)        | 6279 (99.7%)       | 6614 (99.6%)            |
|                   |                                            | Number of measurements                       | 5 (3, 9)             | 5 (2, 8)           | 5 (3, 10)               |
|                   | Hematocrit (hct)                           | Baseline                                     | 39.1 (35.3, 42.7)    | 37.8 (34.4, 40.9)  | 40.8 (36.5, 44.2)       |
|                   |                                            | Peak                                         | 40.1 (36.3, 43.7)    | 38.6 (35.4, 41.7)  | 41.9 (37.7, 45.2)       |
|                   |                                            | Number of subjects with $\geq 1$ measurement | 12893 (99.6%)        | 6279 (99.7%)       | 6614 (99.6%)            |
|                   |                                            | Number of measurements                       | 5 (3, 9)             | 5 (2, 8)           | 5 (3, 10)               |
|                   | Platelets                                  | Baseline                                     | 210 (160, 270)       | 220 (171, 282)     | 199 (153, 258)          |
|                   |                                            | Peak                                         | 275 (206, 368)       | 279 (213, 370)     | 271 (200, 365)          |
|                   |                                            | Number of subjects with $\geq 1$ measurement | 12887 (99.6%)        | 6276 (99.6%)       | 6611 (99.5%)            |
|                   |                                            | Number of measurements                       | 5 (3, 9)             | 5 (2, 8)           | 5 (3, 10)               |
| Hepatic           | Alanine aminotransferase (alt)             | Baseline                                     | 25 (16, 43)          | 22 (14, 36)        | 29 (19, 50)             |
|                   |                                            | Peak                                         | 34 (20, 69)          | 28 (17, 54)        | 42 (24, 83)             |
|                   |                                            | Number of subjects with $\geq 1$ measurement | 12130 (93.7%)        | 5731 (91.0%)       | 6399 (96.4%)            |
|                   |                                            | Number of measurements                       | 4 (2, 7)             | 3 (1, 6)           | 4 (2, 7)                |
|                   | Aspartate aminotransferase (ast)           | Baseline                                     | 34 (23, 54)          | 31 (21.5, 48)      | 37 (25, 58.125)         |
|                   |                                            | Peak                                         | 42 (27, 77)          | 37 (24, 64)        | 48 (29, 87.25)          |
|                   |                                            | Number of subjects with $\geq 1$ measurement | 12131 (93.7%)        | 5731 (91.0%)       | 6400 (96.4%)            |
|                   |                                            | Number of measurements                       | 4 (2, 7)             | 3 (1, 6)           | 4 (2, 7)                |
|                   | Alkaline phosphatase (alkp)                | Baseline                                     | 79 (63, 104)         | 82 (64, 108)       | 78 (61, 101)            |
|                   |                                            | Peak                                         | 87 (68, 119)         | 88 (68, 121)       | 86 (67, 118)            |
|                   |                                            | Number of subjects with $\geq 1$ measurement | 12125 (93.7%)        | 5724 (90.9%)       | 6401 (96.4%)            |
|                   |                                            | Number of measurements                       | 4 (2, 7)             | 3 (1, 6)           | 4 (2, 7)                |
|                   |                                            | Baseline                                     | 0.5 (0.3, 0.7)       | 0.4 (0.3, 0.6)     | 0.5 (0.4, 0.7)          |

|                                              |                             |                                              |                  |                   |                   |
|----------------------------------------------|-----------------------------|----------------------------------------------|------------------|-------------------|-------------------|
|                                              | Total bilirubin (tbili)     | Peak                                         | 0.5 (0.4, 0.8)   | 0.5 (0.3, 0.7)    | 0.6 (0.4, 0.9)    |
|                                              |                             | Number of subjects with $\geq 1$ measurement | 12127 (93.7%)    | 5724 (90.9%)      | 6403 (96.4%)      |
|                                              |                             | Number of measurements                       | 4 (2, 7)         | 3 (1, 6)          | 4 (2, 7)          |
|                                              | Albumin (alb)               | Baseline                                     | 3.7 (3.35, 4.05) | 3.7 (3.4, 4)      | 3.7 (3.3, 4.05)   |
|                                              |                             | Peak                                         | 3.8 (3.4, 4.1)   | 3.8 (3.4, 4.1)    | 3.8 (3.4, 4.1)    |
|                                              |                             | Number of subjects with $\geq 1$ measurement | 12145 (93.8%)    | 5731 (91.0%)      | 6414 (96.6%)      |
|                                              |                             | Number of measurements                       | 4 (2, 7)         | 3 (1, 6)          | 4 (2, 8)          |
|                                              | Lactate dehydrogenase (ldh) | Baseline                                     | 301 (230, 406)   | 289 (224, 389)    | 313.5 (237, 424)  |
|                                              |                             | Peak                                         | 334 (248, 464)   | 316.25 (240, 437) | 350 (259, 487.25) |
|                                              |                             | Number of subjects with $\geq 1$ measurement | 9258 (71.5%)     | 4314 (68.5%)      | 4944 (74.4%)      |
|                                              |                             | Number of measurements                       | 1 (0, 3)         | 1 (0, 3)          | 2 (0, 4)          |
|                                              | Metabolic                   | Glucose (glucose)                            | Baseline         | 119 (102, 150)    | 115 (99, 145)     |
| Peak                                         |                             |                                              | 143 (117, 202)   | 138.58 (113, 192) | 148 (120, 212.08) |
| Number of subjects with $\geq 1$ measurement |                             |                                              | 12586 (97.3%)    | 5958 (94.6%)      | 6628 (99.8%)      |
| Number of measurements                       |                             |                                              | 5 (3, 9)         | 5 (3, 8)          | 6 (3, 10)         |
| Anion gap (anion)                            |                             | Baseline                                     | 13 (11, 15)      | 13 (11, 15)       | 13 (11, 15)       |
|                                              |                             | Peak                                         | 14 (12, 16)      | 14 (12, 16)       | 14 (12, 16)       |
|                                              |                             | Number of subjects with $\geq 1$ measurement | 12583 (97.2%)    | 5954 (94.5%)      | 6629 (99.8%)      |
|                                              |                             | Number of measurements                       | 5 (3, 9)         | 5 (3, 8)          | 6 (3, 10)         |

Summary measures are presented as count (percentage) number of subjects with  $\geq 1$  measurement and median (interquartile range) for baseline, peak, and number of measurements.



**Supplementary Table 2.** Detailed results of simulation studies

**A. Model 1 (LME with a linear time trend)**

**A.1 Using baseline measures**

|                | Scenario 1        |        |      | Scenario 2        |        |       | Scenario 3        |        | Scenario 4        |        | Scenario 5        |        |
|----------------|-------------------|--------|------|-------------------|--------|-------|-------------------|--------|-------------------|--------|-------------------|--------|
|                | Estimated $\beta$ | TPR    | FPR  | Estimated $\beta$ | TPR    | FPR   | Estimated $\beta$ | TPR    | Estimated $\beta$ | FPR    | Estimated $\beta$ | FPR    |
| <b>Group 1</b> |                   |        |      |                   |        |       |                   |        |                   |        |                   |        |
| Biomarker 1    | 0.1439 (0.0533)   | 100.0% | N/A  | 0.0022 (0.0363)   | N/A    | 10.0% | 0.2610 (0.0980)   | 100.0% | -0.0001 (0.0113)  | 14.00% | -0.0013 (0.0104)  | 15.50% |
| Biomarker 2    | 0.1451 (0.0601)   | 100.0% | N/A  | 0.0011 (0.0295)   | N/A    | 10.0% | 0.2632 (0.0977)   | 100.0% | 0.0001 (0.0103)   | 14.50% | -0.0003 (0.0098)  | 16.00% |
| <b>Group 2</b> |                   |        |      |                   |        |       |                   |        |                   |        |                   |        |
| Biomarker 3    | 0.0074 (0.0420)   | N/A    | 6.5% | 0.1526 (0.0611)   | 100.0% | N/A   | 0.2740 (0.0870)   | 100.0% | -0.0019 (0.0119)  | 15.00% | 0.0005 (0.0125)   | 14.50% |
| Biomarker 4    | -0.0044 (0.0392)  | N/A    | 6.5% | 0.1517 (0.0601)   | 100.0% | N/A   | 0.2715 (0.0831)   | 100.0% | 0.0006 (0.0119)   | 16.00% | 0.0006 (0.0125)   | 14.50% |

**A.2 Using peak measures**

|                | Scenario 1        |        |       | Scenario 2        |        |      | Scenario 3        |        | Scenario 4        |        | Scenario 5        |        |
|----------------|-------------------|--------|-------|-------------------|--------|------|-------------------|--------|-------------------|--------|-------------------|--------|
|                | Estimated $\beta$ | TPR    | FPR   | Estimated $\beta$ | TPR    | FPR  | Estimated $\beta$ | TPR    | Estimated $\beta$ | FPR    | Estimated $\beta$ | FPR    |
| <b>Group 1</b> |                   |        |       |                   |        |      |                   |        |                   |        |                   |        |
| Biomarker 1    | 0.2012 (0.0853)   | 100.0% | N/A   | -0.0008 (0.0233)  | N/A    | 5.0% | 0.1926 (0.0955)   | 100.0% | -0.0017 (0.0115)  | 18.00% | -0.0006 (0.0103)  | 16.00% |
| Biomarker 2    | 0.1656 (0.0738)   | 100.0% | N/A   | 0.0006 (0.0215)   | N/A    | 5.0% | 0.2418 (0.1338)   | 100.0% | 0.0003 (0.0116)   | 17.50% | -0.0007 (0.0101)  | 16.50% |
| <b>Group 2</b> |                   |        |       |                   |        |      |                   |        |                   |        |                   |        |
| Biomarker 3    | 0.0037 (0.0542)   | N/A    | 12.0% | 0.1629 (0.0541)   | 100.0% | N/A  | 0.2566 (0.0841)   | 100.0% | 0.0001 (0.0124)   | 17.00% | -0.0012 (0.0112)  | 13.50% |
| Biomarker 4    | -0.0059 (0.0574)  | N/A    | 12.0% | 0.1607 (0.0461)   | 100.0% | N/A  | 0.2598 (0.0868)   | 100.0% | 0.0020 (0.0133)   | 17.00% | 0.0006 (0.0114)   | 13.50% |

**A.3 Using FPC scores**

|                  | Scenario 1        |        |      | Scenario 2        |        |      | Scenario 3        |        | Scenario 4        |       | Scenario 5        |       |
|------------------|-------------------|--------|------|-------------------|--------|------|-------------------|--------|-------------------|-------|-------------------|-------|
|                  | Estimated $\beta$ | TPR    | FPR  | Estimated $\beta$ | TPR    | FPR  | Estimated $\beta$ | TPR    | Estimated $\beta$ | FPR   | Estimated $\beta$ | FPR   |
| <b>Group 1</b>   |                   |        |      |                   |        |      |                   |        |                   |       |                   |       |
| Biomarker 1 FPC1 | 0.1315 (0.0328)   | 100.0% | N/A  | 0.0000 (0.0000)   | N/A    | 0.0% | 0.0908 (0.0304)   | 100.0% | -5e-04 (0.0038)   | 9.00% | -7e-04 (0.0054)   | 9.50% |
| Biomarker 1 FPC2 | -0.0125 (0.0428)  | 94.0%  | N/A  | 0.0000 (0.0000)   | N/A    | 0.0% | -0.0105 (0.0169)  | 92.0%  | 0e+00 (0.0051)    | 9.00% | 3e-04 (0.0054)    | 9.50% |
| Biomarker 1 FPC3 | 0.0041 (0.0311)   | 90.5%  | N/A  | 0.0000 (0.0000)   | N/A    | 0.0% | 0.0021 (0.0130)   | 92.5%  | 2e-04 (0.0053)    | 9.00% | -3e-04 (0.0052)   | 9.50% |
| Biomarker 2 FPC1 | -0.1317 (0.0380)  | 100.0% | N/A  | 0.0000 (0.0000)   | N/A    | 0.0% | -0.0934 (0.0539)  | 100.0% | 1e-04 (0.0038)    | 8.50% | 3e-04 (0.0057)    | 9.50% |
| Biomarker 2 FPC2 | 0.0085 (0.0317)   | 93.5%  | N/A  | 0.0000 (0.0000)   | N/A    | 0.0% | 0.0061 (0.0444)   | 93.5%  | 8e-04 (0.0052)    | 9.00% | 3e-04 (0.0048)    | 9.50% |
| Biomarker 2 FPC3 | -0.0047 (0.0291)  | 90.5%  | N/A  | 0.0000 (0.0000)   | N/A    | 0.0% | -0.0013 (0.0336)  | 88.0%  | 0e+00 (0.0035)    | 9.00% | -3e-04 (0.0038)   | 9.00% |
| <b>Group 2</b>   |                   |        |      |                   |        |      |                   |        |                   |       |                   |       |
| Biomarker 3 FPC1 | 0.0000 (0.0033)   | N/A    | 3.5% | 0.1333 (0.0248)   | 100.0% | N/A  | 0.1526 (0.0285)   | 100.0% | -1e-04 (0.0017)   | 5.50% | -2e-04 (0.0023)   | 8.50% |
| Biomarker 3 FPC2 | 0.0002 (0.0022)   | N/A    | 3.0% | -0.0157 (0.0232)  | 92.5%  | N/A  | -0.0117 (0.0269)  | 91.5%  | -3e-04 (0.0038)   | 5.50% | 0e+00 (0.0031)    | 8.50% |
| Biomarker 3 FPC3 | -0.0003 (0.0032)  | N/A    | 3.5% | 0.0073 (0.0234)   | 91.0%  | N/A  | 0.0042 (0.0221)   | 93.0%  | 0e+00 (0.0026)    | 5.50% | 1e-04 (0.0023)    | 8.50% |
| Biomarker 4 FPC1 | 0.0002 (0.0047)   | N/A    | 3.5% | -0.1343 (0.0234)  | 100.0% | N/A  | -0.1535 (0.0267)  | 100.0% | 3e-04 (0.0028)    | 5.50% | -2e-04 (0.0044)   | 8.50% |
| Biomarker 4 FPC2 | -0.0001 (0.0017)  | N/A    | 3.5% | -0.0117 (0.0251)  | 89.5%  | N/A  | -0.0127 (0.0257)  | 93.0%  | 0e+00 (0.0023)    | 5.50% | -3e-04 (0.0051)   | 8.50% |
| Biomarker 4 FPC3 | -0.0002 (0.0023)  | N/A    | 3.5% | 0.0069 (0.0216)   | 91.5%  | N/A  | 0.0047 (0.0247)   | 87.0%  | 2e-04 (0.0031)    | 5.50% | 3e-04 (0.0035)    | 8.50% |

## B. Model 1 (LME with a quadratic term for time)

### B.1 Using baseline measures

|                | Scenario 1        |        |       | Scenario 2        |        |       | Scenario 3        |        | Scenario 4        |        | Scenario 5        |        |
|----------------|-------------------|--------|-------|-------------------|--------|-------|-------------------|--------|-------------------|--------|-------------------|--------|
|                | Estimated $\beta$ | TPR    | FPR   | Estimated $\beta$ | TPR    | FPR   | Estimated $\beta$ | TPR    | Estimated $\beta$ | FPR    | Estimated $\beta$ | FPR    |
| <b>Group 1</b> |                   |        |       |                   |        |       |                   |        |                   |        |                   |        |
| Biomarker 1    | 0.1563 (0.0659)   | 100.0% | N/A   | -0.0009 (0.0173)  | N/A    | 21.0% | 0.0763 (0.0562)   | 99.0%  | 2e-04 (0.0087)    | 15.50% | 6e-04 (0.0092)    | 17.00% |
| Biomarker 2    | 0.1572 (0.0727)   | 100.0% | N/A   | 0.0013 (0.0198)   | N/A    | 21.0% | 0.0757 (0.0568)   | 99.0%  | 0e+00 (0.0083)    | 15.50% | 1e-04 (0.0085)    | 16.50% |
| <b>Group 2</b> |                   |        |       |                   |        |       |                   |        |                   |        |                   |        |
| Biomarker 3    | 0.0005 (0.0270)   | N/A    | 18.0% | 0.1627 (0.0719)   | 100.0% | N/A   | 0.0988 (0.0420)   | 100.0% | -8e-04 (0.0096)   | 17.00% | 0e+00 (0.0122)    | 18.00% |
| Biomarker 4    | 0.0025 (0.0263)   | N/A    | 18.0% | 0.1632 (0.0729)   | 100.0% | N/A   | 0.1030 (0.0478)   | 100.0% | 2e-04 (0.0110)    | 17.50% | -2e-04 (0.0114)   | 18.00% |

### B.2 Using peak measures

|                | Scenario 1        |        |       | Scenario 2        |        |       | Scenario 3        |        | Scenario 4        |        | Scenario 5        |        |
|----------------|-------------------|--------|-------|-------------------|--------|-------|-------------------|--------|-------------------|--------|-------------------|--------|
|                | Estimated $\beta$ | TPR    | FPR   | Estimated $\beta$ | TPR    | FPR   | Estimated $\beta$ | TPR    | Estimated $\beta$ | FPR    | Estimated $\beta$ | FPR    |
| <b>Group 1</b> |                   |        |       |                   |        |       |                   |        |                   |        |                   |        |
| Biomarker 1    | 0.1535 (0.0642)   | 100.0% | N/A   | -0.0032 (0.0182)  | N/A    | 22.0% | 0.0639 (0.0485)   | 98.0%  | 7e-04 (0.0085)    | 14.00% | 0.0000 (0.0089)   | 17.00% |
| Biomarker 2    | 0.1539 (0.0658)   | 100.0% | N/A   | -0.0033 (0.0192)  | N/A    | 22.0% | 0.0648 (0.0503)   | 98.0%  | 8e-04 (0.0088)    | 13.50% | 0.0002 (0.0083)   | 17.00% |
| <b>Group 2</b> |                   |        |       |                   |        |       |                   |        |                   |        |                   |        |
| Biomarker 3    | -0.0020 (0.0263)  | N/A    | 17.0% | 0.1626 (0.0723)   | 100.0% | N/A   | 0.0902 (0.0387)   | 100.0% | -8e-04 (0.0104)   | 17.50% | 0.0003 (0.0105)   | 20.50% |
| Biomarker 4    | 0.0008 (0.0255)   | N/A    | 17.0% | 0.1638 (0.0747)   | 100.0% | N/A   | 0.0945 (0.0433)   | 100.0% | 0e+00 (0.0119)    | 18.00% | -0.0012 (0.0119)  | 20.50% |

### B.3 Using FPC scores

|                  | Scenario 1        |        |      | Scenario 2        |        |      | Scenario 3        |        | Scenario 4        |        | Scenario 5        |       |
|------------------|-------------------|--------|------|-------------------|--------|------|-------------------|--------|-------------------|--------|-------------------|-------|
|                  | Estimated $\beta$ | TPR    | FPR  | Estimated $\beta$ | TPR    | FPR  | Estimated $\beta$ | TPR    | Estimated $\beta$ | FPR    | Estimated $\beta$ | FPR   |
| <b>Group 1</b>   |                   |        |      |                   |        |      |                   |        |                   |        |                   |       |
| Biomarker 1 FPC1 | -0.1183 (0.0184)  | 100.0% | N/A  | 0.0000 (0.0000)   | N/A    | 0.0% | -0.0357 (0.0180)  | 98.5%  | -1e-04 (0.0041)   | 12.00% | -1e-04 (0.0021)   | 4.50% |
| Biomarker 1 FPC2 | 0.0107 (0.0300)   | 98.0%  | N/A  | 0.0000 (0.0000)   | N/A    | 0.0% | -0.0020 (0.0134)  | 95.0%  | 0e+00 (0.0027)    | 12.00% | 3e-04 (0.0024)    | 4.50% |
| Biomarker 1 FPC3 | -0.0011 (0.0140)  | 90.0%  | N/A  | 0.0000 (0.0000)   | N/A    | 0.0% | -0.0007 (0.0073)  | 87.5%  | 3e-04 (0.0039)    | 11.50% | 1e-04 (0.0017)    | 4.50% |
| Biomarker 2 FPC1 | -0.1186 (0.0215)  | 100.0% | N/A  | 0.0000 (0.0000)   | N/A    | 0.0% | -0.0374 (0.0313)  | 98.5%  | -4e-04 (0.0032)   | 12.00% | -1e-04 (0.0007)   | 4.00% |
| Biomarker 2 FPC2 | 0.0015 (0.0317)   | 96.0%  | N/A  | 0.0000 (0.0000)   | N/A    | 0.0% | -0.0012 (0.0351)  | 89.5%  | 4e-04 (0.0057)    | 12.00% | -1e-04 (0.0020)   | 4.50% |
| Biomarker 2 FPC3 | -0.0003 (0.0140)  | 87.5%  | N/A  | 0.0000 (0.0000)   | N/A    | 0.0% | -0.0007 (0.0073)  | 87.0%  | 3e-04 (0.0036)    | 11.50% | -1e-04 (0.0024)   | 4.50% |
| <b>Group 2</b>   |                   |        |      |                   |        |      |                   |        |                   |        |                   |       |
| Biomarker 3 FPC1 | -0.0003 (0.0039)  | N/A    | 0.5% | -0.1148 (0.0128)  | 100.0% | N/A  | -0.0662 (0.0128)  | 100.0% | -1e-04 (0.0036)   | 10.50% | 1e-04 (0.0024)    | 5.00% |
| Biomarker 3 FPC2 | -0.0004 (0.0057)  | N/A    | 0.5% | 0.0208 (0.0297)   | 97.0%  | N/A  | 0.0011 (0.0213)   | 95.0%  | -4e-04 (0.0044)   | 10.50% | -4e-04 (0.0022)   | 5.00% |
| Biomarker 3 FPC3 | -0.0001 (0.0011)  | N/A    | 0.5% | 0.0039 (0.0136)   | 90.0%  | N/A  | -0.0001 (0.0132)  | 90.0%  | 4e-04 (0.0047)    | 10.50% | -1e-04 (0.0028)   | 5.00% |
| Biomarker 4 FPC1 | 0.0004 (0.0063)   | N/A    | 0.5% | -0.1147 (0.0126)  | 100.0% | N/A  | -0.0684 (0.0181)  | 100.0% | -2e-04 (0.0037)   | 10.50% | 3e-04 (0.0019)    | 5.00% |
| Biomarker 4 FPC2 | 0.0002 (0.0033)   | N/A    | 0.5% | 0.0192 (0.0295)   | 97.0%  | N/A  | 0.0019 (0.0204)   | 90.5%  | 3e-04 (0.0037)    | 10.00% | 0e+00 (0.0023)    | 5.00% |
| Biomarker 4 FPC3 | -0.0002 (0.0021)  | N/A    | 0.5% | 0.0053 (0.0142)   | 89.0%  | N/A  | -0.0001 (0.0104)  | 92.5%  | 2e-04 (0.0035)    | 10.50% | 1e-04 (0.0030)    | 5.00% |

## C. Model 1 (LME with a 3-knot spline function for time)

### C.1 Using baseline measures

|                | Scenario 1        |        |      | Scenario 2        |        |      | Scenario 3        |        | Scenario 4        |        | Scenario 5        |        |
|----------------|-------------------|--------|------|-------------------|--------|------|-------------------|--------|-------------------|--------|-------------------|--------|
|                | Estimated $\beta$ | TPR    | FPR  | Estimated $\beta$ | TPR    | FPR  | Estimated $\beta$ | TPR    | Estimated $\beta$ | FPR    | Estimated $\beta$ | FPR    |
| <b>Group 1</b> |                   |        |      |                   |        |      |                   |        |                   |        |                   |        |
| Biomarker 1    | 0.1327 (0.0479)   | 100.0% | N/A  | -0.0003 (0.0224)  | N/A    | 5.5% | 0.2131 (0.1193)   | 98.5%  | -8e-04 (0.0095)   | 16.50% | -0.0003 (0.0096)  | 20.00% |
| Biomarker 2    | 0.1383 (0.0433)   | 100.0% | N/A  | -0.0013 (0.0265)  | N/A    | 5.5% | 0.2203 (0.1239)   | 98.5%  | 9e-04 (0.0110)    | 17.50% | 0.0011 (0.0106)   | 19.50% |
| <b>Group 2</b> |                   |        |      |                   |        |      |                   |        |                   |        |                   |        |
| Biomarker 3    | -0.0007 (0.0190)  | N/A    | 5.5% | 0.1429 (0.0516)   | 100.0% | N/A  | 0.2459 (0.0992)   | 100.0% | -7e-04 (0.0130)   | 16.00% | -0.0002 (0.0147)  | 16.00% |
| Biomarker 4    | 0.0017 (0.0206)   | N/A    | 5.5% | 0.1413 (0.0468)   | 100.0% | N/A  | 0.2440 (0.0952)   | 100.0% | 2e-04 (0.0135)    | 16.00% | -0.0005 (0.0146)  | 16.00% |

### C.2 Using peak measures

|                | Scenario 1        |        |       | Scenario 2        |        |      | Scenario 3        |        | Scenario 4        |        | Scenario 5        |        |
|----------------|-------------------|--------|-------|-------------------|--------|------|-------------------|--------|-------------------|--------|-------------------|--------|
|                | Estimated $\beta$ | TPR    | FPR   | Estimated $\beta$ | TPR    | FPR  | Estimated $\beta$ | TPR    | Estimated $\beta$ | FPR    | Estimated $\beta$ | FPR    |
| <b>Group 1</b> |                   |        |       |                   |        |      |                   |        |                   |        |                   |        |
| Biomarker 1    | 0.1970 (0.0856)   | 100.0% | N/A   | 0.0044 (0.0273)   | N/A    | 5.0% | 0.2350 (0.1384)   | 99.5%  | 0.0150 (0.0230)   | 41.50% | 0.0013 (0.0115)   | 19.50% |
| Biomarker 2    | 0.1584 (0.0658)   | 100.0% | N/A   | -0.0047 (0.0282)  | N/A    | 5.0% | 0.1880 (0.1106)   | 99.5%  | -0.0020 (0.0183)  | 40.50% | 0.0005 (0.0119)   | 20.00% |
| <b>Group 2</b> |                   |        |       |                   |        |      |                   |        |                   |        |                   |        |
| Biomarker 3    | 0.0207 (0.0702)   | N/A    | 10.0% | 0.1883 (0.0699)   | 100.0% | N/A  | 0.3113 (0.1489)   | 100.0% | 0.0148 (0.0280)   | 40.50% | -0.0005 (0.0148)  | 16.50% |
| Biomarker 4    | -0.0202 (0.0719)  | N/A    | 10.0% | 0.1415 (0.0339)   | 100.0% | N/A  | 0.1781 (0.0755)   | 100.0% | -0.0157 (0.0295)  | 40.50% | -0.0008 (0.0135)  | 16.50% |

### C.3 Using FPC scores

|                  | Scenario 1        |        |      | Scenario 2        |        |      | Scenario 3        |        | Scenario 4        |       | Scenario 5        |       |
|------------------|-------------------|--------|------|-------------------|--------|------|-------------------|--------|-------------------|-------|-------------------|-------|
|                  | Estimated $\beta$ | TPR    | FPR  | Estimated $\beta$ | TPR    | FPR  | Estimated $\beta$ | TPR    | Estimated $\beta$ | FPR   | Estimated $\beta$ | FPR   |
| <b>Group 1</b>   |                   |        |      |                   |        |      |                   |        |                   |       |                   |       |
| Biomarker 1 FPC1 | 0.1215 (0.0335)   | 100.0% | N/A  | 0.0000 (0.0000)   | N/A    | 0.0% | 0.0901 (0.0638)   | 99.0%  | 2e-04 (0.0037)    | 9.00% | -1e-04 (0.0028)   | 6.50% |
| Biomarker 1 FPC2 | -0.0025 (0.0337)  | 95.0%  | N/A  | 0.0000 (0.0000)   | N/A    | 0.0% | 0.0025 (0.0502)   | 89.5%  | 1e-04 (0.0041)    | 8.50% | -1e-04 (0.0028)   | 6.50% |
| Biomarker 1 FPC3 | 0.0086 (0.0294)   | 91.0%  | N/A  | 0.0000 (0.0000)   | N/A    | 0.0% | 0.0025 (0.0269)   | 89.0%  | 2e-04 (0.0037)    | 8.50% | 0e+00 (0.0040)    | 6.50% |
| Biomarker 2 FPC1 | -0.1251 (0.0336)  | 100.0% | N/A  | 0.0000 (0.0000)   | N/A    | 0.0% | -0.0936 (0.0777)  | 99.0%  | -3e-04 (0.0033)   | 8.50% | -2e-04 (0.0036)   | 5.50% |
| Biomarker 2 FPC2 | -0.0130 (0.0306)  | 94.0%  | N/A  | 0.0000 (0.0000)   | N/A    | 0.0% | -0.0182 (0.0723)  | 93.5%  | -3e-04 (0.0027)   | 8.50% | 1e-04 (0.0041)    | 6.00% |
| Biomarker 2 FPC3 | -0.0010 (0.0299)  | 95.5%  | N/A  | 0.0000 (0.0000)   | N/A    | 0.0% | -0.0071 (0.0605)  | 90.5%  | -1e-04 (0.0035)   | 8.50% | 2e-04 (0.0038)    | 6.50% |
| <b>Group 2</b>   |                   |        |      |                   |        |      |                   |        |                   |       |                   |       |
| Biomarker 3 FPC1 | 0.0000 (0.0028)   | N/A    | 3.5% | 0.1337 (0.0297)   | 100.0% | N/A  | 0.1552 (0.0464)   | 100.0% | -1e-04 (0.0035)   | 8.00% | 2e-04 (0.0030)    | 5.50% |
| Biomarker 3 FPC2 | 0.0000 (0.0049)   | N/A    | 4.0% | -0.0061 (0.0279)  | 94.5%  | N/A  | -0.0031 (0.0291)  | 93.5%  | 4e-04 (0.0040)    | 8.00% | 3e-04 (0.0033)    | 5.00% |
| Biomarker 3 FPC3 | -0.0001 (0.0042)  | N/A    | 4.0% | 0.0077 (0.0229)   | 88.5%  | N/A  | 0.0102 (0.0247)   | 88.5%  | 3e-04 (0.0033)    | 8.00% | 4e-04 (0.0036)    | 5.50% |
| Biomarker 4 FPC1 | 0.0002 (0.0029)   | N/A    | 4.0% | -0.1289 (0.0263)  | 100.0% | N/A  | -0.1562 (0.0624)  | 100.0% | 0e+00 (0.0029)    | 8.00% | 0e+00 (0.0028)    | 5.50% |
| Biomarker 4 FPC2 | -0.0002 (0.0035)  | N/A    | 4.0% | -0.0112 (0.0266)  | 96.5%  | N/A  | -0.0190 (0.0663)  | 92.5%  | -1e-04 (0.0026)   | 7.50% | 2e-04 (0.0032)    | 5.00% |
| Biomarker 4 FPC3 | -0.0002 (0.0021)  | N/A    | 4.0% | -0.0005 (0.0227)  | 88.0%  | N/A  | 0.0008 (0.0296)   | 88.5%  | -1e-04 (0.0024)   | 7.50% | 0e+00 (0.0030)    | 5.50% |

Mean and standard deviation of estimated  $\beta$  across 200 repetitions, true positive rate (TPR) calculated as the proportion of simulations where truly non-zero coefficients were selected, or false positive rate (FPR) calculated as the proportion of simulations where truly zero coefficients were selected
